# Supplementary material for: An integrated and comparative approach towards identification, characterization and functional annotation of candidate genes for drought tolerance in sorghum (Sorghum bicolor (L.) Moench)
Source: PubMed Central journal article supplement (PMC5741957; doi:10.1186/s12863-017-0584-5), 2017-12-22
Supplement: 12863_2017_584_MOESM2_ESM.pdf [file 12863_2017_584_MOESM2_ESM.pdf]

## Additional file 2

**Table S1 Summary of sorghum transcript and genomic data**

| Sequence origin | Sequence type             | Number of sequences | GC%  | URL                                                                                                                                                                                                                                                                                                 |
|-----------------|---------------------------|---------------------|------|-----------------------------------------------------------------------------------------------------------------------------------------------------------------------------------------------------------------------------------------------------------------------------------------------------|
| Genome          | Chromosomes               | 10                  | 41.6 | <a href="http://www.phytozome.net/sorghum">http://www.phytozome.net/sorghum</a>                                                                                                                                                                                                                     |
|                 | Super scaffold            | 3394                | 40.9 | <a href="http://www.phytozome.net/sorghum">http://www.phytozome.net/sorghum</a>                                                                                                                                                                                                                     |
| UniGene         | Unclustered UniGene       | 199087              | 52.9 | <a href="http://www.ncbi.nlm.nih.gov/UniGene/">http://www.ncbi.nlm.nih.gov/UniGene/</a>                                                                                                                                                                                                             |
|                 | Clustered UniGene         | 14057               | 52.0 | <a href="http://www.ncbi.nlm.nih.gov/UniGene/">http://www.ncbi.nlm.nih.gov/UniGene/</a>                                                                                                                                                                                                             |
| ESTs            | TIGR transcripts          | 209835              | 53.3 | <a href="http://www.ncbi.nlm.nih.gov/dbEST/">http://www.ncbi.nlm.nih.gov/dbEST/</a><br><a href="http://www.plantgdb.org/prj/ESTCluster/">http://www.plantgdb.org/prj/ESTCluster/</a><br><a href="ftp://occams.dfc.harvard.edu/pub/bio/tgi/data/">ftp://occams.dfc.harvard.edu/pub/bio/tgi/data/</a> |
|                 | NCBI dbEST                | 20199               | 50.7 | <a href="http://www.ncbi.nlm.nih.gov/dbEST/">http://www.ncbi.nlm.nih.gov/dbEST/</a>                                                                                                                                                                                                                 |
| RNA-seq         | Maize GEO data (GSE40070) | 3000000 reads       | NA   | <a href="http://www.ncbi.nlm.nih.gov/geo/">http://www.ncbi.nlm.nih.gov/geo/</a>                                                                                                                                                                                                                     |

**Table S2 Overview of UniGene libraries (build # 30)**

| <b>Main parts of plants</b> | <b>Tissues</b> | <b>Number of lib<sup>a</sup></b> | <b>Library ID</b>                     | <b>Name of Library</b>                | <b>Sequence number</b> |
|-----------------------------|----------------|----------------------------------|---------------------------------------|---------------------------------------|------------------------|
| Body site                   | Callus         | 1                                | Lib.13735                             | Callus culture/cell suspension        | 10449                  |
|                             | embryo         | 2                                | Lib.5437                              | Embryo 1 (EM1)                        | 9843                   |
|                             | leaf           | 12                               | Lib.15546                             | Wounded leaves                        | 11221                  |
|                             |                |                                  | Lib.10086                             | Pathogen-infected compatible 1 (PIC1) | 9092                   |
|                             |                |                                  | Lib.14497                             | Drought-stressed after flowering      | 6295                   |
|                             |                |                                  | Lib.14500                             | Drought-stressed before flowering     | 3597                   |
|                             |                |                                  | 8 not shown                           | Drought-stressed before flowering     | each <1000             |
|                             | ovary          | 3                                | Lib.5439                              | Ovary 1 (OV1)                         | 5052                   |
|                             |                |                                  | Lib.7266                              | Ovary 2 (OV2)                         | 4983                   |
|                             |                |                                  | 1 not shown                           |                                       | <1000                  |
|                             | panicle        | 2                                | Lib.9519                              | Immature panicle 1 (IP1)              | 9588                   |
|                             |                |                                  | 1 not shown                           |                                       | <1000                  |
|                             | pollen         | 1                                | Lib.14372                             | Pollen                                | 10212                  |
|                             | chloroplast    | 1                                | not shown                             |                                       | each <1000             |
|                             | root           | 3                                | Lib.15544                             | Acid- and alkaline-treated roots      | 7744                   |
|                             |                |                                  | Lib.16897                             | Anaerobic roots                       | 6113                   |
|                             |                |                                  | Lib.20762                             | Sorghum bicolor BTx623 Root hair      | 5468                   |
|                             |                |                                  |                                       |                                       |                        |
|                             | shoot          | 2                                | Lib.16898                             | GA- or brassinolide-treated seedlings | 11134                  |
|                             |                |                                  | 1 not shown                           |                                       | <1000                  |
| Whole                       | 4              | not shown                        |                                       | each <1000                            |                        |
| Unspecified tissue          | 1              | not shown                        |                                       | <1000                                 |                        |
| mixed                       | 13             | Lib.4037                         | Dark Grown 1 (DG1)                    | 11099                                 |                        |
|                             |                | Lib.13713                        | Heat-shocked seedlings                | 10558                                 |                        |
|                             |                | Lib.15545                        | Oxidatively-stressed leaves and roots | 10086                                 |                        |
|                             |                | Lib.4038                         | Water-stressed 1 (WS1)                | 10039                                 |                        |
|                             |                | Lib.13770                        | Ethylene-treated seedlings            | 6942                                  |                        |
|                             |                | Lib.13736                        | Salt-stressed seedlings               | 6737                                  |                        |
|                             |                | Lib.13769                        | Salicylic acid-treated seedlings      | 5801                                  |                        |
|                             |                | Lib.12996                        | Abscisic acid-treated seedlings       | 4907                                  |                        |
|                             |                | Lib.14109                        |                                       | 3984                                  |                        |
|                             |                | Lib.14297                        |                                       | 3849                                  |                        |
|                             |                | Lib.14296                        |                                       | 3723                                  |                        |

| <b>Main parts of plants</b> | <b>Tissues</b>                         | <b>Number of lib<sup>a</sup></b> | <b>Library ID</b>                   | <b>Name of Library</b>                                                                      | <b>Sequence number</b>     |
|-----------------------------|----------------------------------------|----------------------------------|-------------------------------------|---------------------------------------------------------------------------------------------|----------------------------|
|                             |                                        |                                  | 2 not shown                         | Iron-deficient seedlings<br>Nitrogen-deficient seedlings<br>Phosphorous-deficient seedlings | each < 1000                |
|                             | not yet classified                     | 4                                | Lib.5441<br>Lib.2801<br>2 not shown | Pathogen induced 1 (PI1)<br>Light Grown 1 (LG1)                                             | 9569<br>9451<br>each <1000 |
| Developmental stage         | Germinating seed                       | 2                                | Not shown                           |                                                                                             | each <1000                 |
|                             | seedling                               | 25                               | Not shown                           |                                                                                             | each < 1000                |
|                             | seedling                               | 9                                | Not shown                           |                                                                                             | each < 1000                |
|                             | vegetative                             | 1                                | Not shown                           |                                                                                             | < 1000                     |
|                             | flowering                              | 1                                | Not shown                           |                                                                                             | < 1000                     |
|                             | ripening                               | 1                                | Not shown                           |                                                                                             | < 1000                     |
|                             | unknown                                | 3                                | Not shown                           |                                                                                             | each < 1000                |
|                             | developmental stage not yet classified | 2                                | Not shown                           |                                                                                             | each < 1000                |

**Table S3 Chromosomal distribution of UniGene clusters mapped to genome**

| Chromosomes | UniGene clusters that overlapped Known genes |                         |       | UniGene clusters that mapped to intergenic region |        |       | Grand Total |
|-------------|----------------------------------------------|-------------------------|-------|---------------------------------------------------|--------|-------|-------------|
|             | DR <sup>1</sup>                              | Non-DR(DR) <sup>2</sup> | Total | DR                                                | Non-DR | Total |             |
| Chr1        | 20                                           | 1733 (37)               | 1753  | 22                                                | 91     | 113   | 1866        |
| Chr2        | 14                                           | 1181 (33)               | 1195  | 20                                                | 69     | 89    | 1284        |
| Chr3        | 16                                           | 1322 (39)               | 1338  | 15                                                | 73     | 88    | 1427        |
| Chr4        | 13                                           | 1150 (35)               | 1163  | 12                                                | 64     | 76    | 1239        |
| Chr5        | 4                                            | 432 (13)                | 436   | 7                                                 | 49     | 56    | 493         |
| Chr6        | 19                                           | 876 (21)                | 895   | 10                                                | 64     | 74    | 966         |
| Chr7        | 9                                            | 670 (23)                | 679   | 9                                                 | 61     | 70    | 749         |
| Chr8        | 8                                            | 544 (13)                | 552   | 7                                                 | 63     | 70    | 622         |
| Chr9        | 14                                           | 883 (27)                | 897   | 12                                                | 66     | 78    | 976         |
| Chr10       | 6                                            | 750 (15)                | 756   | 7                                                 | 54     | 61    | 817         |
| Super       | 0                                            | 99 (2)                  | 99    | 7                                                 | 74     | 81    | 180         |
| Total       | 123                                          | 9640 (258)              | 9763  | 128                                               | 728    | 856   | 10619       |

**Key to legend:**

<sup>1</sup> UniGene clusters that represent purely drought responsive

<sup>2</sup> UniGene clusters that basically represent non-drought responsive, however, contain shorter ESTs which were expressed under drought conditions dispersed within the clusters.

**Table S4 Comparison and update of annotation**

| Description | Existing annotation |       | Current annotation |       |             |      |
|-------------|---------------------|-------|--------------------|-------|-------------|------|
|             | gene models         | mRNA  | Updated            |       | Novel       |      |
|             |                     |       | gene models        | mRNA  | gene models | mRNA |
| Original    | 34211               | 37205 | 30937              | 33862 | -           | -    |
| Updated     | -                   | -     | 3274               | 3343  | 210         | 210  |
| Total       | 34211               | 37205 | 34211              | 37205 | 210         | 210  |

This supplementary table shows the comparison and update of annotation between existing and current prediction of sorghum genome based on PASA alignment evidence.

**Table S5 Functional distribution of the novel gene structure models**

| Known<br>drought-related<br>function | Complete genes            |                         | Partial genes           |                              |                           | Total |
|--------------------------------------|---------------------------|-------------------------|-------------------------|------------------------------|---------------------------|-------|
|                                      | 3' and 5' UTR<br>attained | only 3' UTR<br>attained | only 5' UTR<br>attained | at-least one<br>end attained | truncated at<br>both ends |       |
| DR                                   | 12                        | 15                      | 2                       | 29                           | 137                       | 166   |
| NDR                                  | 0                         | 0                       | 0                       | 0                            | 44                        | 44    |
| Total                                | 12                        | 15                      | 2                       | 29                           | 181                       | 210   |

**Table S6 Chromosomal distribution of existing genes modified corresponding to the position and structure of modification.**

| Scaffolds | Chromosomal distribution of the modified existing gene models |                |                |                |                |                |                |                |                | Total |
|-----------|---------------------------------------------------------------|----------------|----------------|----------------|----------------|----------------|----------------|----------------|----------------|-------|
|           | A <sup>1</sup>                                                | B <sup>2</sup> | C <sup>3</sup> | D <sup>4</sup> | E <sup>5</sup> | F <sup>6</sup> | G <sup>7</sup> | H <sup>8</sup> | I <sup>9</sup> |       |
| chr1      | 3                                                             | 16             | 24             | 642            | 0              | 0              | 1              | 0              | 0              | 685   |
| chr2      | 6                                                             | 11             | 7              | 373            | 0              | 0              | 0              | 1              | 0              | 397   |
| chr3      | 2                                                             | 19             | 14             | 445            | 0              | 0              | 0              | 1              | 0              | 480   |
| chr4      | 2                                                             | 13             | 11             | 402            | 0              | 0              | 1              | 0              | 0              | 428   |
| chr5      | 2                                                             | 3              | 7              | 170            | 0              | 0              | 0              | 0              | 0              | 182   |
| chr6      | 2                                                             | 8              | 5              | 220            | 0              | 0              | 0              | 0              | 0              | 235   |
| chr7      | 0                                                             | 5              | 10             | 193            | 0              | 0              | 0              | 0              | 0              | 208   |
| chr8      | 0                                                             | 4              | 4              | 182            | 0              | 0              | 0              | 0              | 0              | 190   |
| chr9      | 3                                                             | 2              | 3              | 254            | 0              | 1              | 0              | 0              | 0              | 263   |
| chr10     | 1                                                             | 4              | 11             | 248            | 0              | 0              | 0              | 0              | 1              | 265   |
| super     | 0                                                             | 0              | 0              | 10             | 0              | 0              | 0              | 0              | 0              | 10    |
| Total     | 21                                                            | 85             | 96             | 3139           | 0              | 1              | 2              | 2              | 1              | 3343  |

Legend to key:

A<sup>1</sup> Transcript A; B<sup>2</sup> Transcript B; C<sup>3</sup> Transcript C; D<sup>4</sup> Transcript D; E<sup>5</sup> Transcript E;  
 F<sup>6</sup> Transcript F; G<sup>7</sup> Transcript G; H<sup>8</sup> Transcript H and I<sup>9</sup> Transcript I (Figure 1)

**Table S7 Chromosomal distribution of the novel gene structure models**

| Scaffolds | Partial gene structure  |                    |                  |                    |                        |                     | Total |
|-----------|-------------------------|--------------------|------------------|--------------------|------------------------|---------------------|-------|
|           | Complete gene structure |                    | One end retained |                    | truncated at both ends |                     |       |
|           | DR <sup>a</sup>         | ND-DR <sup>b</sup> | DR <sup>a</sup>  | ND-DR <sup>b</sup> | DR <sup>a</sup>        | Non-DR <sup>b</sup> |       |
| chr1      | 3                       | 0                  | 0                | 0                  | 12                     | 13                  | 28    |
| chr2      | 3                       | 0                  | 0                | 0                  | 9                      | 8                   | 20    |
| chr3      | 1                       | 0                  | 2                | 0                  | 15                     | 3                   | 21    |
| chr4      | 1                       | 0                  | 4                | 0                  | 10                     | 8                   | 23    |
| chr5      | 0                       | 0                  | 2                | 0                  | 11                     | 6                   | 19    |
| chr6      | 0                       | 0                  | 1                | 0                  | 8                      | 3                   | 12    |
| chr7      | 1                       | 0                  | 4                | 0                  | 10                     | 5                   | 20    |
| chr8      | 2                       | 0                  | 0                | 0                  | 16                     | 7                   | 25    |
| chr9      | 0                       | 0                  | 2                | 0                  | 16                     | 2                   | 20    |
| chr10     | 1                       | 0                  | 2                | 0                  | 11                     | 6                   | 20    |
| super     | 0                       | 0                  | 0                | 0                  | 1                      | 1                   | 2     |
| Total     | 12                      | 0                  | 17               | 0                  | 119                    | 62                  | 210   |

**Key to legend:** <sup>a</sup> Drought responsive; <sup>b</sup> Non-drought responsive



**Table S8 Genomic distribution of spliced and retained intron based on PASA analysis**

| S <sup>1</sup> | Intron            |                |                |                |                   |                |                |                |
|----------------|-------------------|----------------|----------------|----------------|-------------------|----------------|----------------|----------------|
|                | Coordinate        | Spliced        |                |                | Retained          |                |                |                |
|                |                   | O <sup>2</sup> | A <sup>3</sup> | M <sup>4</sup> | Coordinate        | O <sup>2</sup> | A <sup>3</sup> | M <sup>4</sup> |
| chr1           | 1819870-1820018   | +              | 64             | 1              | 1819870-1820018   | +              | 65             | 1              |
| chr1           | 2245082-2245182   | -              | 83             | 5              | 2245082-2245182   |                | 84             | 2              |
| chr1           | 2630315-2630410   | -              | 101            | 1              | 2630315-2630410   | -              | 102            | 2              |
| chr1           | 8195826-8195903   | -              | 306            | 1              | 8195826-8195903   | -              | 307            | 1              |
| chr1           | 47862385-4786251  | +              | 638            | 6              | 47862385-4786251  | +              | 639            | 6              |
| chr1           | 56966890-56966985 | -              | 779            | 2              | 56966890-56966985 | -              | 780            | 1              |
| chr1           | 58887490-58887568 | -              | 819            | 3              | 58887490-58887568 | -              | 820            | 1              |
| chr1           | 58887601-58887781 | -              | 819            | 1              | 58887601-58887781 | -              | 820            | 1              |
| chr1           | 61110177-61110310 | -              | 896            | 9              | 61110177-61110310 | -              | 897            | 2              |
| chr1           | 67980410-67980506 | +              | 1125           | 6              | 67980410-67980506 | +              | 1126           | 2              |
| chr2           | 69162027-69162097 | -              | 2358           | 2              | 69162027-69162097 | -              | 2357           | 2              |
| chr3           | 62293574-62293685 | -              | 3153           | 3              | 62293574-62293685 | -              | 3154           | 1              |
| chr4           | 65061928-65062017 | +              | 4139           | 2              | 65061928-65062017 | +              | 4140           | 1              |
| chr6           | 45323794-45323870 | -              | 4626           | 18             | 45323794-45323870 | -              | 4627           | 1              |
| chr6           | 60237462-60237612 | +              | 4942           | 2              | 60237462-60237612 | +              | 4943           | 1              |
| chr7           | 8345323-8345537   | +              | 5138           | 5              | 8345323-8345537   | +              | 5139           | 4              |
| chr8           | 6642051-6642134   | +              | 5536           | 7              | 6642051-6642134   | +              | 5537           | 1              |
| chr8           | 6641856-6641938   | +              | 5536           | 4              | 6641856-6641938   | +              | 5537           | 1              |
| chr8           | 44687799-44687915 | -              | 5622           | 1              | 44687799-44687915 | -              | 5621           | 1              |
| chr9           | 2436568-2436638   | -              | 5784           | 4              | 2436568-2436638   | -              | 5785           | 1              |
| chr9           | 52085543-52085653 | -              | 6061           | 2              | 52085543-52085653 | -              | 6060           | 4              |
| chr9           | 46038980-46039077 | +              | 5954           | 32             | 46038980-46039077 | +              | 5955           | 15             |
| chr9           | 46038375-46038506 | +              | 5953,          | 178            | 46038375-46038506 | +              | 5955           | 4              |
|                |                   |                | 5954           |                |                   |                |                |                |
| chr9           | 54606686-54606830 | +              | 6117           | 2              | 54606686-54606830 | +              | 6118           | 2              |
| chr9           | 57490227-57490310 | -              | 6208           | 5              | 57490227-57490310 | -              | 6209           | 1              |
| chr10          | 58496008-58496090 | -              | 1717           | 2              | 58496008-58496090 | -              | 1718           | 1              |

Key to legend: <sup>1</sup> Chromosomes number 1-10; <sup>2</sup> Orientation of the strand; <sup>3</sup> Assembly number that the transcripts belong to and <sup>4</sup> Maximum evidence support.

**Table S9 Genomic distribution of skipped and retained exons based on PASA analysis**

| S <sup>1</sup> | Exon              |                |                |                |                                         |                |                |                |
|----------------|-------------------|----------------|----------------|----------------|-----------------------------------------|----------------|----------------|----------------|
|                | Skipped           |                |                |                | Retained                                |                |                |                |
|                | Coordinate        | O <sup>2</sup> | A <sup>3</sup> | M <sup>4</sup> | Coordinate                              | O <sup>2</sup> | A <sup>3</sup> | M <sup>4</sup> |
| chr2           | 15949877-15955756 | +              | 1983           | 1              | 15951004-15951091,<br>15951181-15951253 | +              | 1984           | 1              |
| chr2           | 75790551-75791220 | +              | 2540           | 1              | 75790984-75791097                       | +              | 2539           | 7              |
| chr3           | 71528810-71529369 | -              | 3403           | 2              | 71529086-71529156                       | -              | 3404           | 1              |
| chr4           | 4717042-4717529   | +              | 3609           | 1              | 4717411-4717488                         | +              | 3608           | 11             |
| chr6           | 1517417-1519399   | -              | 4521           | 1              | 1518211-1518383                         | -              | 4520           | 2              |
| chr6           | 60298761-60299726 | -              | 4947           | 1              | 60299069-60299251                       | -              | 4946           | 9              |
| chr9           | 54972512-54974544 | -              | 6127           | 2              | 54972660-54973133                       | -              | 6126           | 10             |
| chr10          | 2956478-2957725   | -              | 1340           | 1              | 2956662-2956707                         | -              | 1339           | 1              |
| chr10          | 59988260-59988901 | +              | 1779           | 3              | 59988341-59988410                       | +              | 1780           | 2              |

Key to legend: refer to Table S6.

**Table S10 PASA based identification of alternative splicing (AS) for the novel genes**

| Types of AS          | AS event | Non-AS events |
|----------------------|----------|---------------|
| Alternative acceptor | 42       | -             |
| Alternative donor    | 14       | -             |
| Alternative 5' site  | -        | -             |
| Alternative 3' site  | -        | -             |
| Alternative exon     | 16       | -             |
| Ends in intron       | 10       | -             |
| Retained exon        | -        | 9             |
| Retained Intron      | 27       | -             |
| Skipped exon         | 9        | -             |
| Spliced intron       | -        | 27            |
| Starts in intron     | 18       | -             |
| Total                | 136      | 36            |

**Table S11 Patterns of exonic and intronic features in the novel gene structure models**

| Features <sup>a</sup>          | Feature less     | Single           | Double | Triple | Quadruple | Multiple features |   |   |   |   | Total |
|--------------------------------|------------------|------------------|--------|--------|-----------|-------------------|---|---|---|---|-------|
|                                |                  |                  |        |        |           | 5                 | 6 | 7 | 8 | 9 |       |
| Total Exons                    | 0                | 210              | 105    | 62     | 30        | 17                | 8 | 5 | 2 | 2 | 441   |
| Total introns                  | 0                | 105              | 62     | 30     | 17        | 8                 | 5 | 2 | 2 | 0 | 231   |
| Gene per exonic <sup>b</sup>   | 0                | 105 <sup>d</sup> | 43     | 32     | 13        | 9                 | 3 | 3 | 0 | 2 | 210   |
| Gene per intronic <sup>c</sup> | 105 <sup>e</sup> | 43               | 32     | 13     | 9         | 3                 | 3 | 0 | 2 | 0 | 210   |

Key to legend: <sup>a</sup> Genes, Exons and Introns; <sup>b</sup> Gene number per exonic feature; <sup>c</sup> Gene number per intronic feature; <sup>d</sup> Single exonic genes and <sup>e</sup> Intronless genes.

**Table S12 GO functional enrichment of DR sorghum genes based on orthology groups**

| GO-D <sup>A</sup> | GO ID      | GO-term                         | E/T <sup>B</sup> | GO/Bg <sup>C</sup> | P <sup>D</sup> |
|-------------------|------------|---------------------------------|------------------|--------------------|----------------|
| BP                | GO:0006950 | Response to stress              | 1102/1102        | 3705/26245         | 0.00           |
| BP                | GO:0006950 | Response to water deprivation   | 118/1102         | 374/26245          | 4.98e-55       |
| BP                | GO:0009269 | Response to dessication         | 21/1102          | 71/26245           | 5.4e-09        |
| BP                | GO:0009408 | Response to heat                | 91/1102          | 324/26245          | 1.35e-38       |
| BP                | GO:0009737 | Response to ABA stimulus        | 109/1102         | 664/26245          | 2.87e-28       |
| BP                | GO:0009738 | ABA mediated signalling pathway | 37/1102          | 192/26245          | 4.87e-11       |
| CC                | GO:0044444 | Cytoplasmic part                | 477/1102         | 7660/26245         | 2.07e-20       |
| CC                | GO:0009536 | Plastid                         | 161/1102         | 2109/26245         | 5.95e-11       |
| CC                | GO:0009507 | Chloroplast                     | 144/1102         | 183/26245          | 1.45e-10       |
| CC                | GO:0043227 | Membrane-bounded organelle      | 628/1102         | 10408/26245        | 1.24e-27       |
| CC                | GO:0005886 | Plasma membrane                 | 136/1102         | 1557/26245         | 6.93e-13       |
| MF                | GO:0051082 | Unfolding protein binding       | 36/1102          | 184/26245          | 1.83e-10       |
| MF                | GO:0048037 | Cofactor binding                | 81/1102          | 792/26245          | 5.83e-10       |
| MF                | GO:0005506 | Ion binding                     | 91/1102          | 890/26245          | 3.17e-11       |
| MF                | GO:0016209 | Antioxidant activity            | 72/1102          | 276/26245          | 3.88e-28       |
| MF                | GO:0009055 | Electron transfer activity      | 86/1102          | 984/26245          | 1.59e-07       |

Key to legend: <sup>A</sup>GO-D denotes GO domain; <sup>B</sup>E/T denote enriched genes Vs test set: the numerator and denominator represent the number of enriched genes and test set respectively; <sup>C</sup>GO/Bg denote genes with GO-terms Vs back ground set: the numerator and denominator represent the number of genes for which corresponding GO-terms were assigned and the background set respectively; <sup>D</sup>P denote P-value (FDR). The first top GO-term in each GO-domain, eg. BP: response to stress (GO:0006950), CC: Cytoplasmic part (GO:0044444) and MF: Unfolding protein binding (GO:0051082), represent the most likely term associated to the corresponding number of enriched genes. As such, 1102, 477, and 36 genes respectively were assigned to these GO-terms.

**Table S13 Databases containing potential source for candidate drought responsive genes**

| No. | Databases                                                                              | Link or reference                                                                                                                                                                                                                                                                                                                                                 |
|-----|----------------------------------------------------------------------------------------|-------------------------------------------------------------------------------------------------------------------------------------------------------------------------------------------------------------------------------------------------------------------------------------------------------------------------------------------------------------------|
| 1   | <b>Genome database:</b>                                                                |                                                                                                                                                                                                                                                                                                                                                                   |
|     | Phytozome                                                                              | <a href="http://www.phytozome.net/sorghum">http://www.phytozome.net/sorghum</a> or<br><a href="ftp://ftp.jgi-psf.org/pub/compgen/phytozome/v9.0/Sbicolor_v1.4/">ftp://ftp.jgi-psf.org/pub/compgen/phytozome/v9.0/Sbicolor_v1.4/</a> ; Goodstein <i>et al.</i> , 2012<br><a href="http://www.gramene.org/">http://www.gramene.org/</a> ; Ware <i>et al.</i> , 2002 |
|     | Gramene                                                                                | <a href="http://www.ensembl.org/index.html">http://www.ensembl.org/index.html</a> ; Flicek <i>et al.</i> , 2012 and 2013                                                                                                                                                                                                                                          |
|     | Ensembl                                                                                |                                                                                                                                                                                                                                                                                                                                                                   |
| 2   | <b>Sequences databases:</b>                                                            |                                                                                                                                                                                                                                                                                                                                                                   |
|     | RefSeq                                                                                 | <a href="http://www.ncbi.nlm.nih.gov/refseq/">http://www.ncbi.nlm.nih.gov/refseq/</a>                                                                                                                                                                                                                                                                             |
|     | NCBI                                                                                   | <a href="http://www.ncbi.nlm.nih.gov/">http://www.ncbi.nlm.nih.gov/</a>                                                                                                                                                                                                                                                                                           |
|     | UniGene                                                                                | <a href="http://www.ncbi.nlm.nih.gov/UniGene/">http://www.ncbi.nlm.nih.gov/UniGene/</a> ; Rudd <i>et al.</i> , 2003                                                                                                                                                                                                                                               |
|     | dbESTs                                                                                 | <a href="http://www.ncbi.nlm.nih.gov/dbEST/">http://www.ncbi.nlm.nih.gov/dbEST/</a> ; Boguski <i>et al.</i> , 1993                                                                                                                                                                                                                                                |
|     | Uniprot                                                                                | <a href="http://www.uniprot.org/">http://www.uniprot.org/</a>                                                                                                                                                                                                                                                                                                     |
| 3   | <b>Protein domain databases</b>                                                        |                                                                                                                                                                                                                                                                                                                                                                   |
|     | Uniref                                                                                 | <a href="http://www.uniprot.org/help/uniref">www.uniprot.org/help/uniref</a>                                                                                                                                                                                                                                                                                      |
|     | Uniprot                                                                                | <a href="http://www.uniprot.org/">http://www.uniprot.org/</a>                                                                                                                                                                                                                                                                                                     |
|     | Swissprot                                                                              | <a href="http://www.expasy.ch/sprot/">http://www.expasy.ch/sprot/</a><br><a href="http://www.ebi.ac.uk/swissprot/">http://www.ebi.ac.uk/swissprot/</a>                                                                                                                                                                                                            |
|     | Interoscan                                                                             | <a href="https://www.ebi.ac.uk/interpro/">https://www.ebi.ac.uk/interpro/</a>                                                                                                                                                                                                                                                                                     |
|     | Signal peptides                                                                        | <a href="http://www.signalpeptide.com/">http://www.signalpeptide.com/</a>                                                                                                                                                                                                                                                                                         |
| 4   | <b>Expression databases:</b>                                                           |                                                                                                                                                                                                                                                                                                                                                                   |
|     | Gene Expression Omnibus (GEO):<br>experimental genome microarray data,<br>RNA-seq data | <a href="http://www.ncbi.nlm.nih.gov/geo/">http://www.ncbi.nlm.nih.gov/geo/</a>                                                                                                                                                                                                                                                                                   |

**Table S14 Relevant tools for identification of the candidate gene**

| Ser. # | Tools                                                                                                                   | Links or references                                                                                                                                                                                                                                                                                                                                                                                                                                                                                                                                                                                                                                                                                                                                                |
|--------|-------------------------------------------------------------------------------------------------------------------------|--------------------------------------------------------------------------------------------------------------------------------------------------------------------------------------------------------------------------------------------------------------------------------------------------------------------------------------------------------------------------------------------------------------------------------------------------------------------------------------------------------------------------------------------------------------------------------------------------------------------------------------------------------------------------------------------------------------------------------------------------------------------|
| 1      | alignment tools:<br>Blast,<br>Blat,<br>est2genome<br>exonerate<br>ClustalW<br>ClustalX                                  | <a href="http://blast.ncbi.nlm.nih.gov/Blast.cgi">http://blast.ncbi.nlm.nih.gov/Blast.cgi</a><br><a href="http://genome.ucsc.edu/FAQ/FAQblat.html">http://genome.ucsc.edu/FAQ/FAQblat.html</a><br><a href="http://bioinfo.nhri.org.tw/cgi-bin/emboss/est2genome">http://bioinfo.nhri.org.tw/cgi-bin/emboss/est2genome</a><br><a href="http://www.csc.fi/english/research/sciences/bioscience/programs/exonerate/index_html">http://www.csc.fi/english/research/sciences/bioscience/programs/exonerate/index_html</a><br><a href="http://www.genome.jp/tools/clustalw/">http://www.genome.jp/tools/clustalw/</a><br><a href="http://www.clustal.org/clustal2/">http://www.clustal.org/clustal2/</a>                                                                 |
| 2      | Gene structure prediction tools:<br>Augustus,<br>est2genome<br>exonerate, and<br>PASA<br>Evidence Moduler (EVM),        | <a href="http://augustus.gobics.de/binaries/">http://augustus.gobics.de/binaries/</a><br><a href="ftp://ftp.hgc.jp/pub/mirror/ebi/software/exonerate/">ftp://ftp.hgc.jp/pub/mirror/ebi/software/exonerate/</a><br><a href="http://bioinfo.nhri.org.tw/cgi-bin/emboss/est2genome">http://bioinfo.nhri.org.tw/cgi-bin/emboss/est2genome</a><br><a href="http://www.evidencemodul">http://www.evidencemodul</a><br><a href="http://evidencemodeler.sourceforge.net/">http://evidencemodeler.sourceforge.net/</a>                                                                                                                                                                                                                                                      |
| 3      | Gene enrichment analysis tools:<br>AgriGO<br>Blast2go<br>MeV,<br>Genevestigator,                                        | <a href="http://www.agriGO.org/">http://www.agriGO.org/</a><br><a href="http://www.blast2go.de">http://www.blast2go.de</a><br><a href="http://www.tm4.org/mev.html">http://www.tm4.org/mev.html</a><br><a href="https://www.genevestigator.ethz.ch/">https://www.genevestigator.ethz.ch/</a>                                                                                                                                                                                                                                                                                                                                                                                                                                                                       |
| 4      | Genome viewer tools:<br>Galaxy,<br>Gbrowse<br>USCS-Gbrowse<br>Biomart-ensemble,<br>Biomart-Gramene<br>Biomart Phytozome | <a href="http://usegalaxy.org">http://usegalaxy.org</a> ; <a href="https://main.g2.bx.psu.edu/">https://main.g2.bx.psu.edu/</a><br><a href="http://gmod.org/wiki/GBrowse/tool_data">http://gmod.org/wiki/GBrowse/tool_data</a> ;<br><a href="http://genome.ucsc.edu/">http://genome.ucsc.edu/</a><br><a href="http://www.ensembl.org/info/data/biomart.html">http://www.ensembl.org/info/data/biomart.html</a> ;<br><a href="http://archive.gramene.org/biomart/martview/334378ea281f8c0071af7d45f4ab01f9">http://archive.gramene.org/biomart/martview/334378ea281f8c0071af7d45f4ab01f9</a><br><a href="http://www.phytozome.net/biomart/martview/6ae06d47637222933cd94d5beb507c71">http://www.phytozome.net/biomart/martview/6ae06d47637222933cd94d5beb507c71</a> |
| 5      | Expression profiling analysis tools:<br>Multivariate Experiment Viewer (MeV)                                            | <a href="http://www.tm4.org/mev.html">http://www.tm4.org/mev.html</a>                                                                                                                                                                                                                                                                                                                                                                                                                                                                                                                                                                                                                                                                                              |
| 6      | Sequence quality filtering tools:                                                                                       |                                                                                                                                                                                                                                                                                                                                                                                                                                                                                                                                                                                                                                                                                                                                                                    |

|                             |                                                                                                                                                                                                              |
|-----------------------------|--------------------------------------------------------------------------------------------------------------------------------------------------------------------------------------------------------------|
| RepeatMasker                | <a href="http://www.repeatmasker.org/">http://www.repeatmasker.org/</a>                                                                                                                                      |
| Statistical analysis tools: |                                                                                                                                                                                                              |
| R programming,              | <a href="http://www.r-project.org/">http://www.r-project.org/</a>                                                                                                                                            |
| MeV                         | <a href="http://www.tm4.org/mev.html">http://www.tm4.org/mev.html</a>                                                                                                                                        |
| 7 Programming tools:        |                                                                                                                                                                                                              |
| linux OS                    | <a href="http://www.gnu.org/">http://www.gnu.org/</a>                                                                                                                                                        |
| Perl,                       | <a href="http://www.perlmonks.org/">http://www.perlmonks.org/</a>                                                                                                                                            |
| Python,                     | <a href="http://www.tutorialspoint.com/python/python_tools_utilities.htm">http://www.tutorialspoint.com/python/python_tools_utilities.htm</a>                                                                |
| R, programming modules,     |                                                                                                                                                                                                              |
| Bioperl                     | <a href="http://www.r-project.org/">http://www.r-project.org/</a>                                                                                                                                            |
| Biopython                   | <a href="http://www.bioperl.org/">www.bioperl.org/</a><br><a href="http://www.biopython.org/">www.biopython.org/</a> ; <a href="http://biopython.org/wiki/Main_Page">http://biopython.org/wiki/Main_Page</a> |

**Table S15** Functional description of sorghum drought related metabolic pathways

| Pathway                                | Enzyme                                                               | Enzyme ID                 | Pathway map ID       | Pathway ID             | gene (id) involved               |
|----------------------------------------|----------------------------------------------------------------------|---------------------------|----------------------|------------------------|----------------------------------|
| Aminoacyl-tRNA biosynthesis            | ligase                                                               | EC:6.1.1.16               | map00970             | KO:K01883              | *genes                           |
| Cysteine and methionine metabolism     | Dioxygenase (iron(II)-requiring)                                     | EC:1.13.11.54             | map00270             | KO:K08967              | Sb01g046360                      |
| Drug metabolism - other enzymes        | ali-esterase                                                         | EC:3.1.1.1                | map00983             | *KO                    | novel                            |
| Glucosinolate biosynthesis             | CYP79A1, tyrosine N-mono-oxygenase                                   | EC:1.14.13.41             | Map00966 (sbi00966)  | KO:K13027              | Sb01g001200                      |
| Glycerophospholipid metabolism         | kinase (ATP dependent)                                               | EC:2.7.1.107              | map00564             | KO:K00901              | Sb01g032250                      |
| Glycerolipid metabolism                | kinase (ATP dependent)                                               | EC:2.7.1.107              | map00561             | KO:K00901              | Sb01g032250                      |
| Phosphatidylinositol signalling system | kinase (ATP dependent)                                               | EC:2.7.1.107              | map04070             | KO:K00901              | Sb01g032250                      |
| Nicotinate and nicotinamide metabolism | kinase                                                               | EC:2.7.1.23               | map00760             | KO:K00858              | Sb09g019130                      |
| Oxidative phosphorylation              | Cytochrome c oxidase subunit 1 (Oxidase);<br>Inorganic diphosphatase | EC:1.9.3.1;<br>EC:3.6.1.1 | Map00190<br>map00190 | KO:K02256<br>KO:K02256 | Sb09g022400,<br>COX1;<br>**genes |
| Pyrimidine metabolism                  | RNA polymerase                                                       | EC:2.7.7.6                | map00240             | **KO                   | ***genes                         |
| Purine metabolism                      | RNA polymerase;<br>adenylpyrophosphatase                             | EC:2.7.7.6;<br>EC:3.6.1.3 | Map00230<br>map00230 | **KO<br>KO:K01509      | novel                            |
| Pantothenate biosynthesis              | BCAT                                                                 | EC:2.6.1.42               | sbi00770             | KO:K00826              | ****genes                        |
| VLIB                                   | BCAT                                                                 | EC:2.6.1.42               | sbi00290             | KO:K00826              | ****genes                        |
| VLID                                   | BCAT                                                                 | EC:2.6.1.42               | sbi00280             | KO:K00826              | ****genes                        |

Key to legend:  
 \*KO K01044 carboxylesterase 1; K03927 carboxylesterase 2; K03928 carboxylesterase; K15743 carboxylesterase 3/5  
 \*\*KO KO:K03006; KO:K02999; KO:K03002; KO:K03006; KO:K03018; KO:K03021; KO:K03043; KO:K03046  
 \*genes Sb01g047380; Sb02g032450  
 \*\*genes Sb09g001530; Sb10g009880; Sb09g004450; Sb09g021610; Sb01g022340; Sb04g036230; Sb04g005710; Sb04g034340; Sb03g013530; Sb03g040910  
 \*\*\*genes Sb05g019520; Sb03g017630; Sb03g020184; Sb04g001790; Sb04g009491; Sb05g019520; Sb06g021120; Sb07g003680; Sb09g027223; Sb09g027230; Sb10g006995  
 \*\*\*\*genes Sb04g010240; Sb06g025140; and Sb09g008180



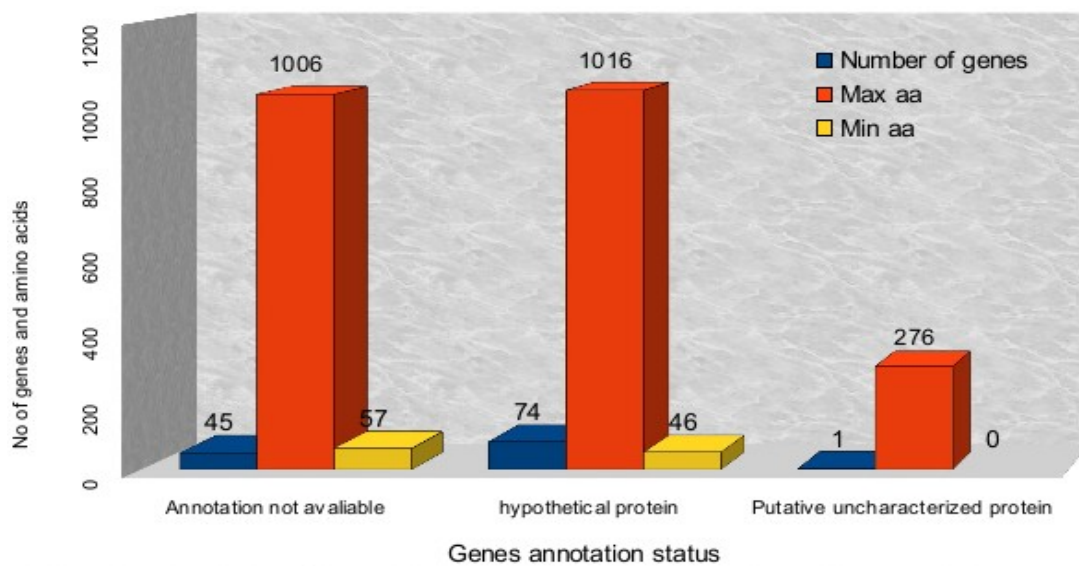

**Figure S1. Identified genes by mapping to existing annotation and their characterization status**

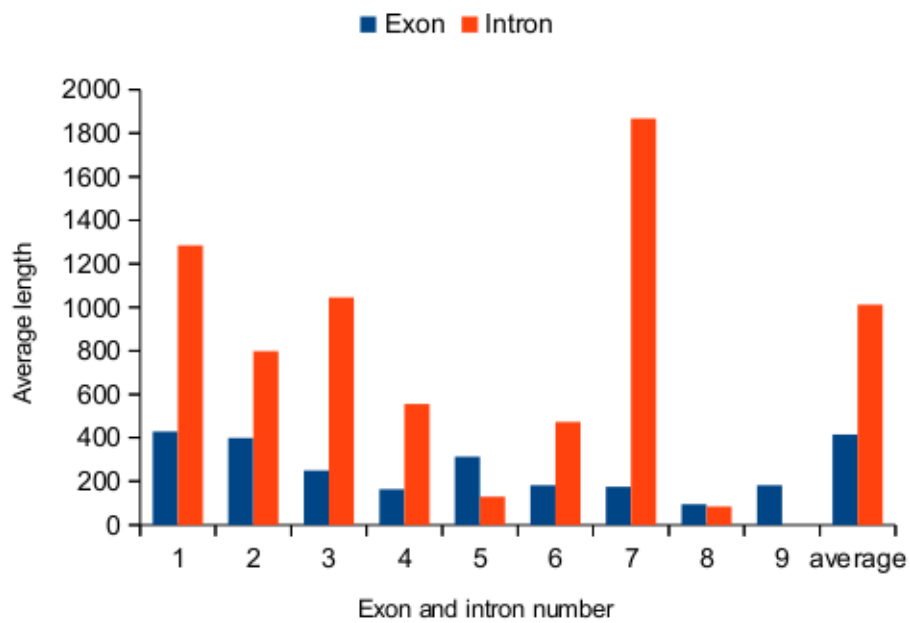

**Figure S2 Pattern of exon and intron number and the average length for novel identified genes.**

Key to legend for exon and intron number: 1=exon1, intron1; 2=exon2, intron2; 3=exon3, intron3; 4=exon4, intron4; 5=exon5, intron5; 6=exon6, intron6; 7=exon7, intron7; 8=exon8, intron8; 9=exon9, intron9 and average = exon total average; intron total average.

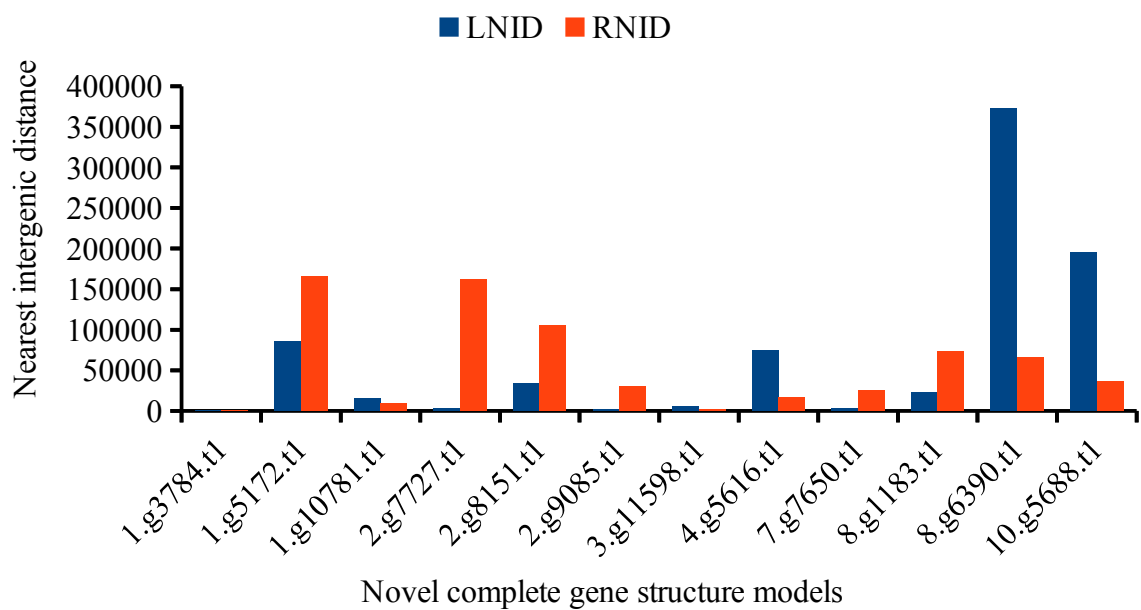

**Figure S3 Nearest intergenic distances.**

Key to legend: RNID (right nearest intergenic distance) and LNID (left nearest intergenic distance).

The intergenic distances between the NGSM and the nearest existing neighbour gene were described based on the fourteen NGSMs known to have complete gene structure. The average RNID represents 57687 bases long while the average LNID represents 67754 bases long.



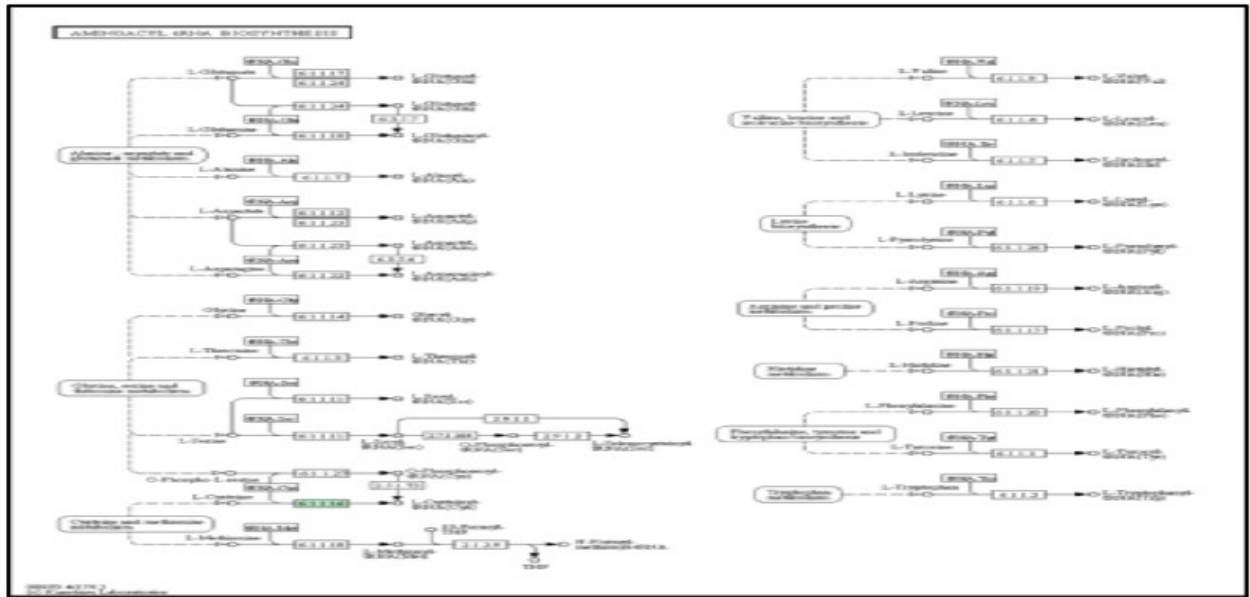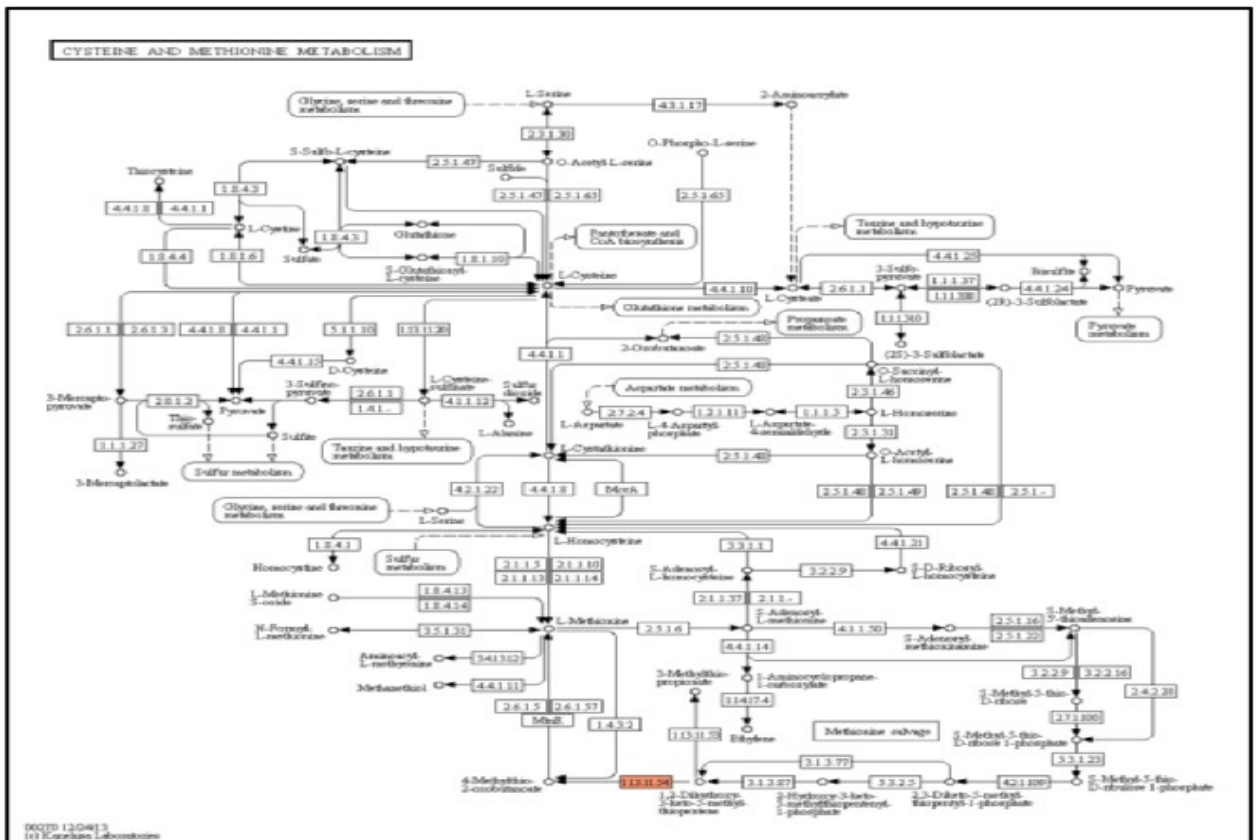

Figure S5 Aminoacyl-tRNA biosynthesis (upper) and Cysteine and methionine metabolism (lower).





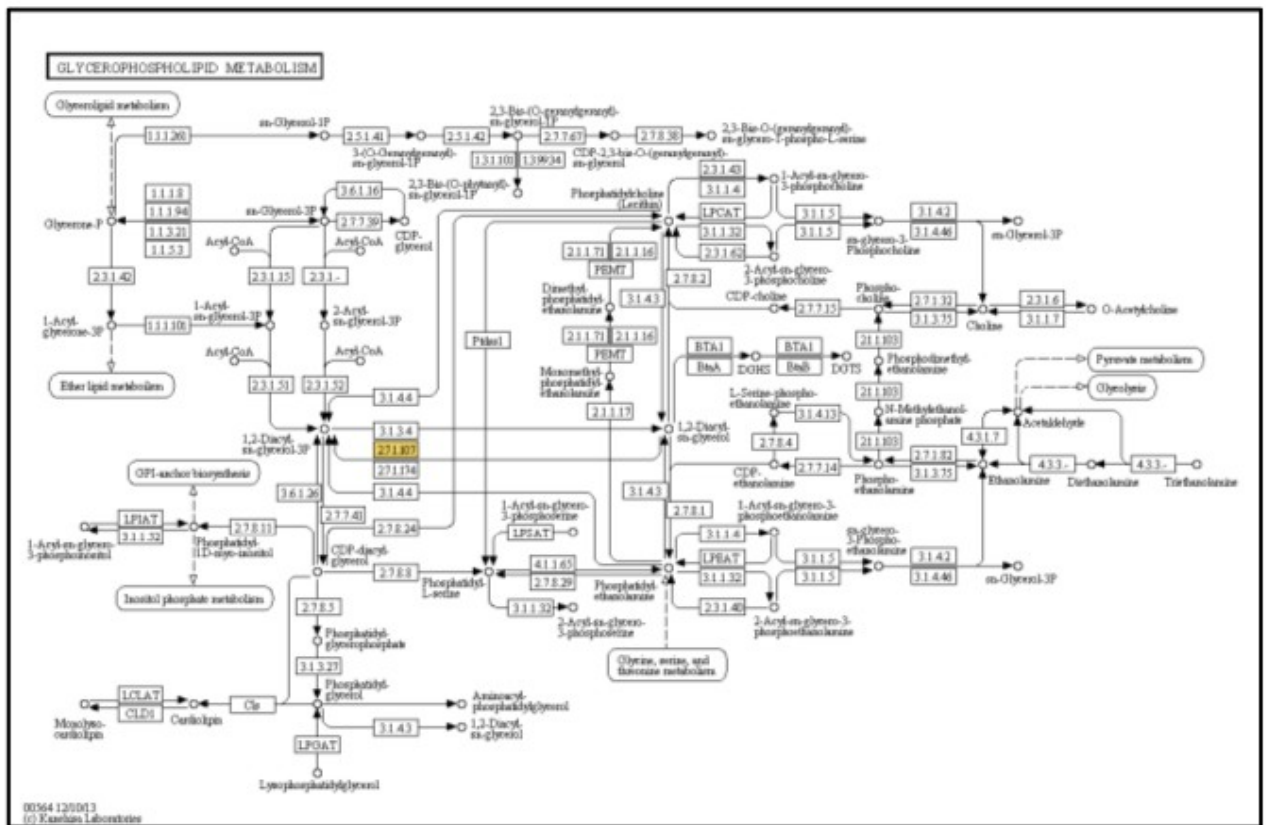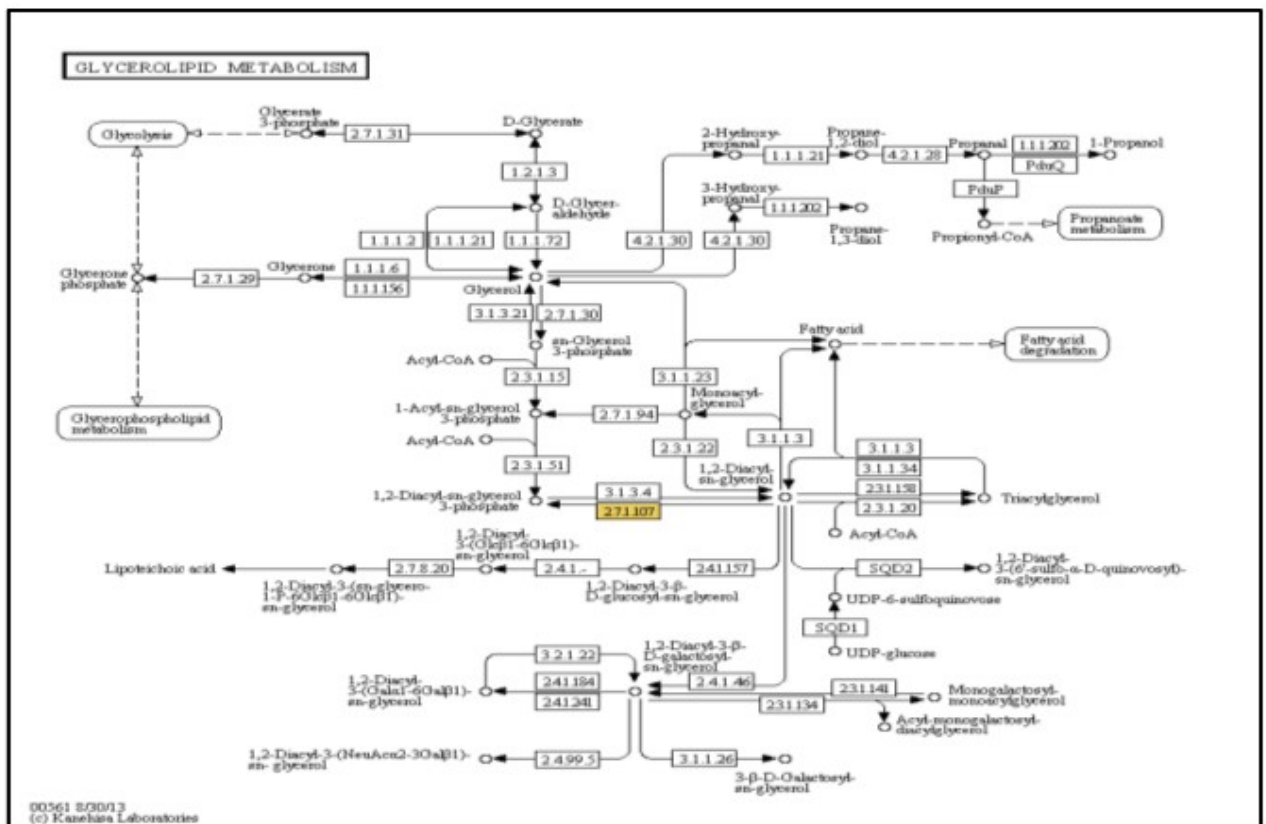

Figure S7 Glycerophospholipid metabolism (upper) and Glycerolipid metabolism (lower).



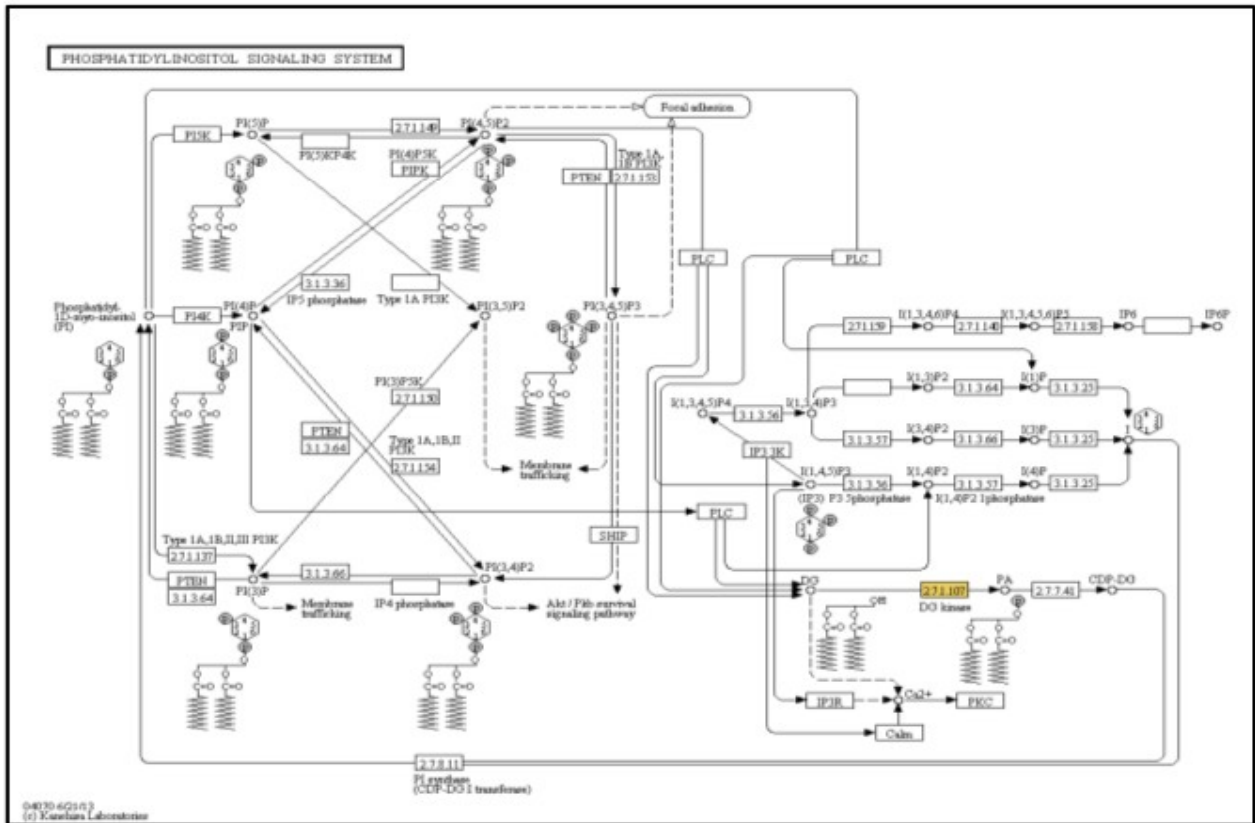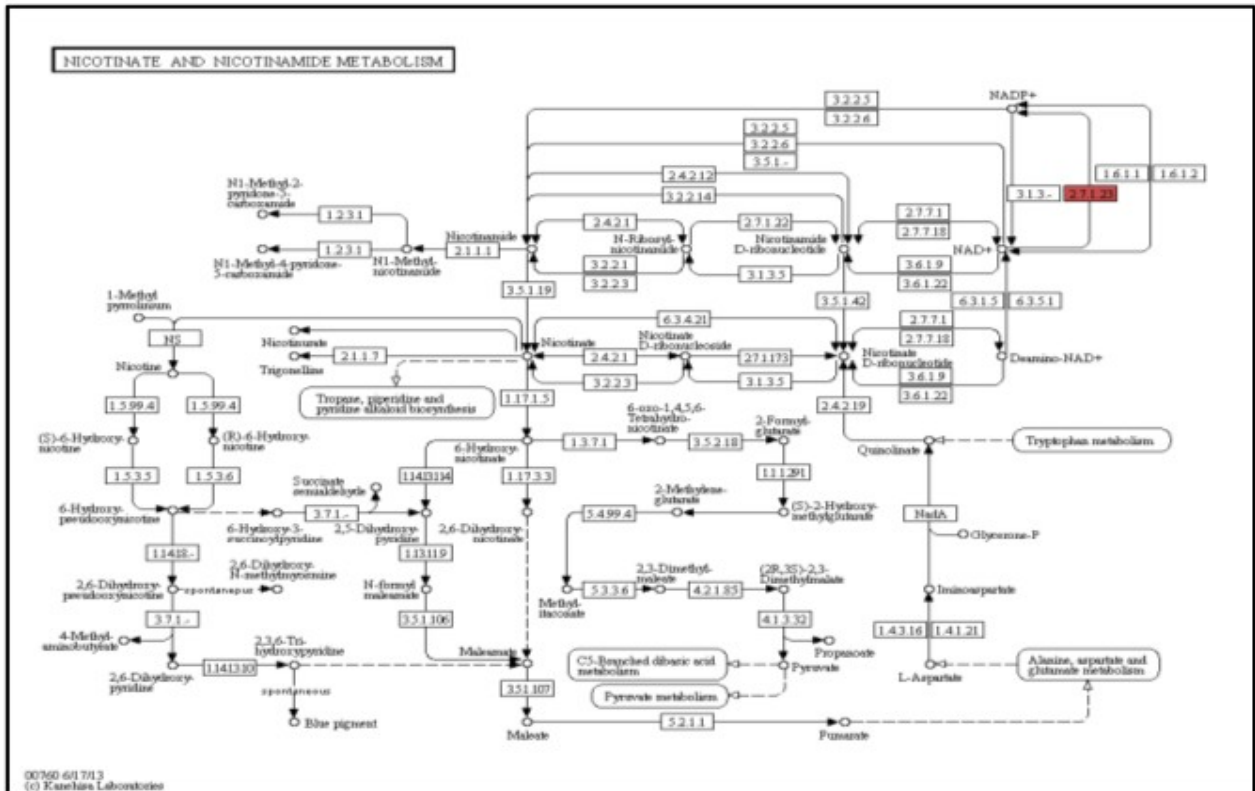

Figure S8 Phosphatidylinositol signalling system (upper) and nicotinate and nicotinate metabolism (lower).





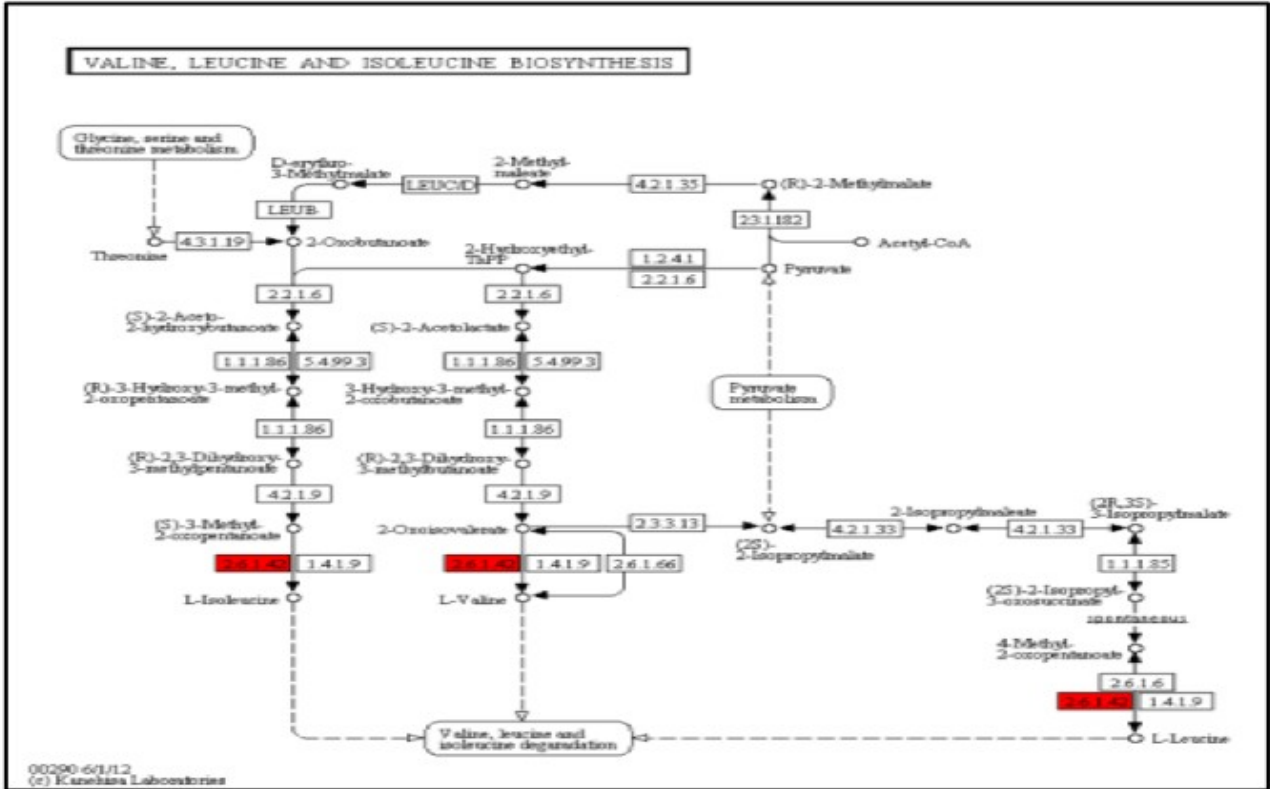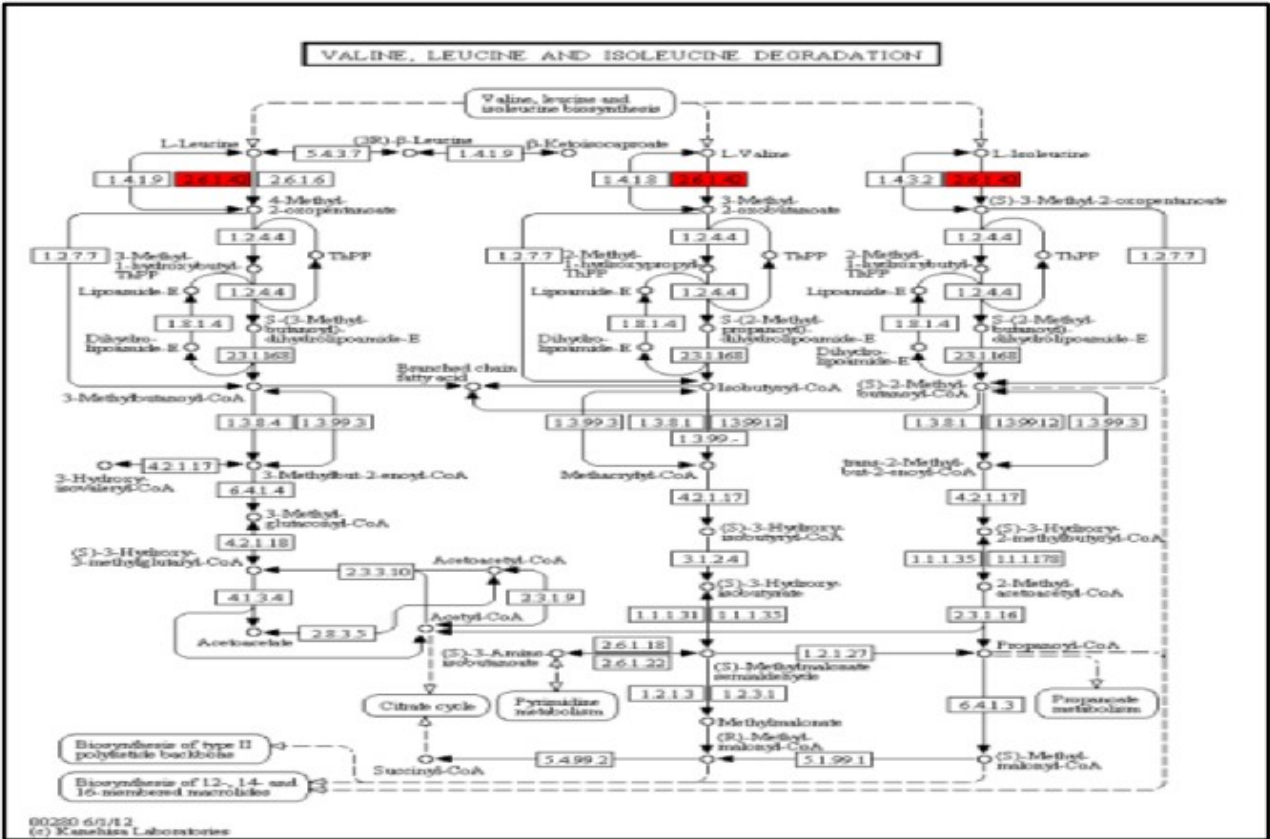

Figure S10 Valine, Lucine and Isoleucine Biosynthesis (upper) and Valine, Lucine and Isoleucine degradation (lower).

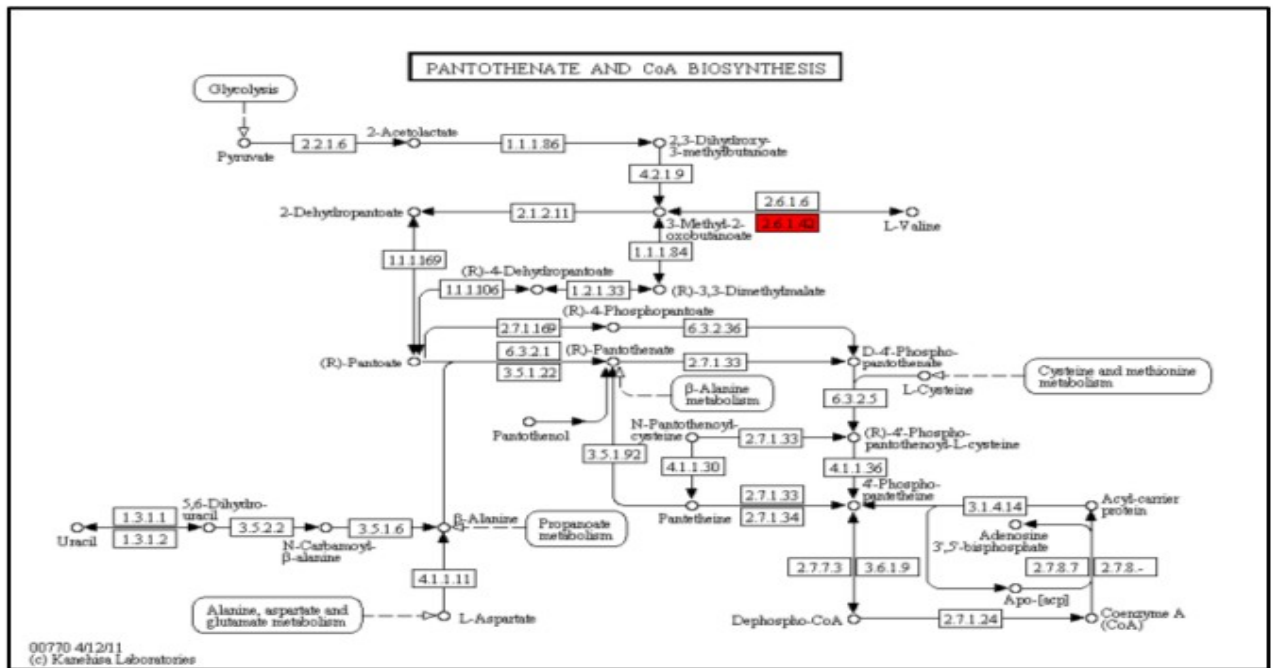

Figure S11 Pantothenate and CoA biosynthesis.

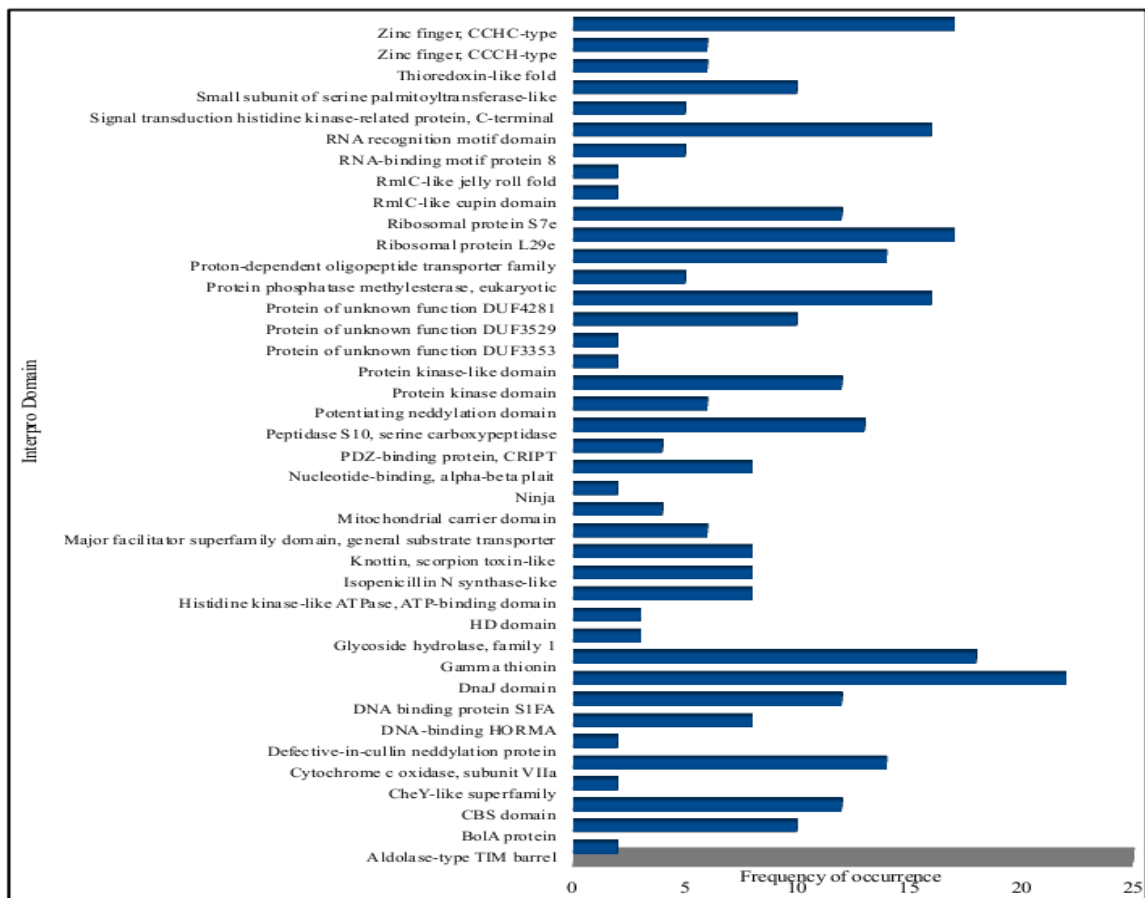

Figure S12 Description of interpro-domain analysis: List of protein signatures identified.

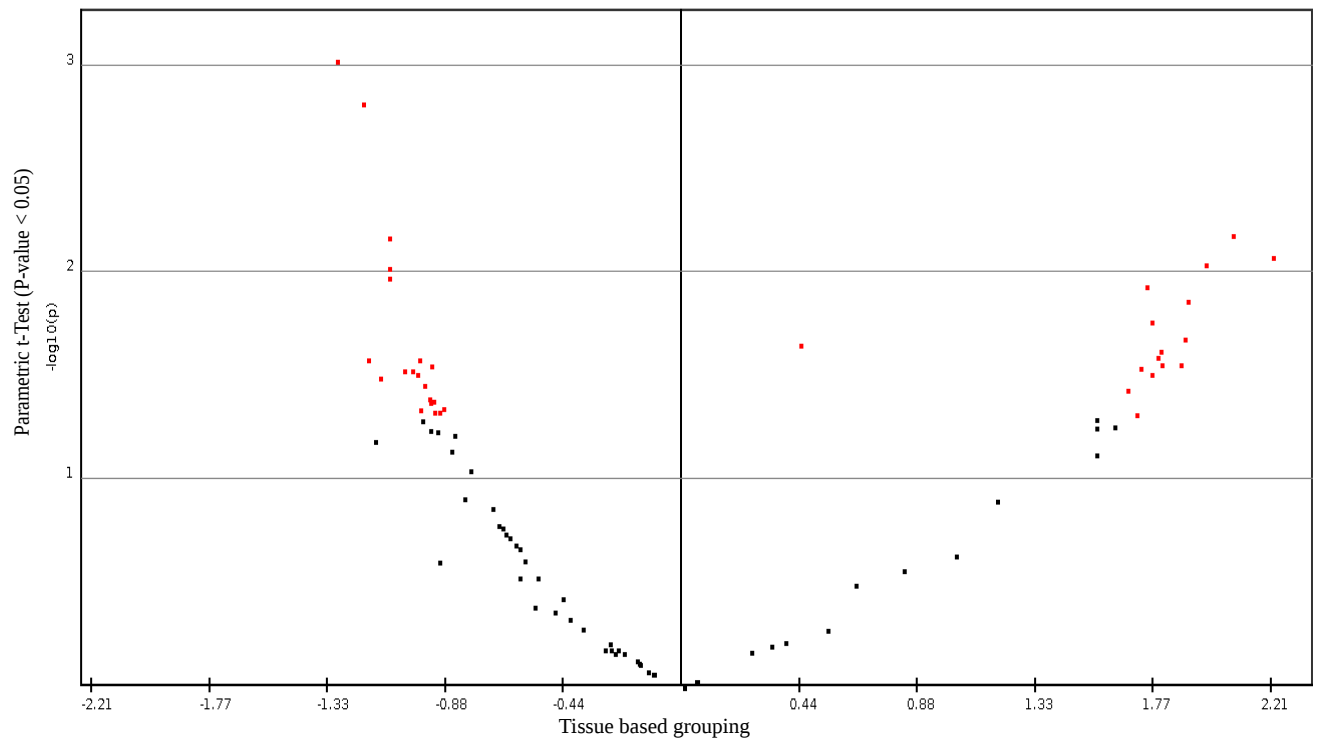

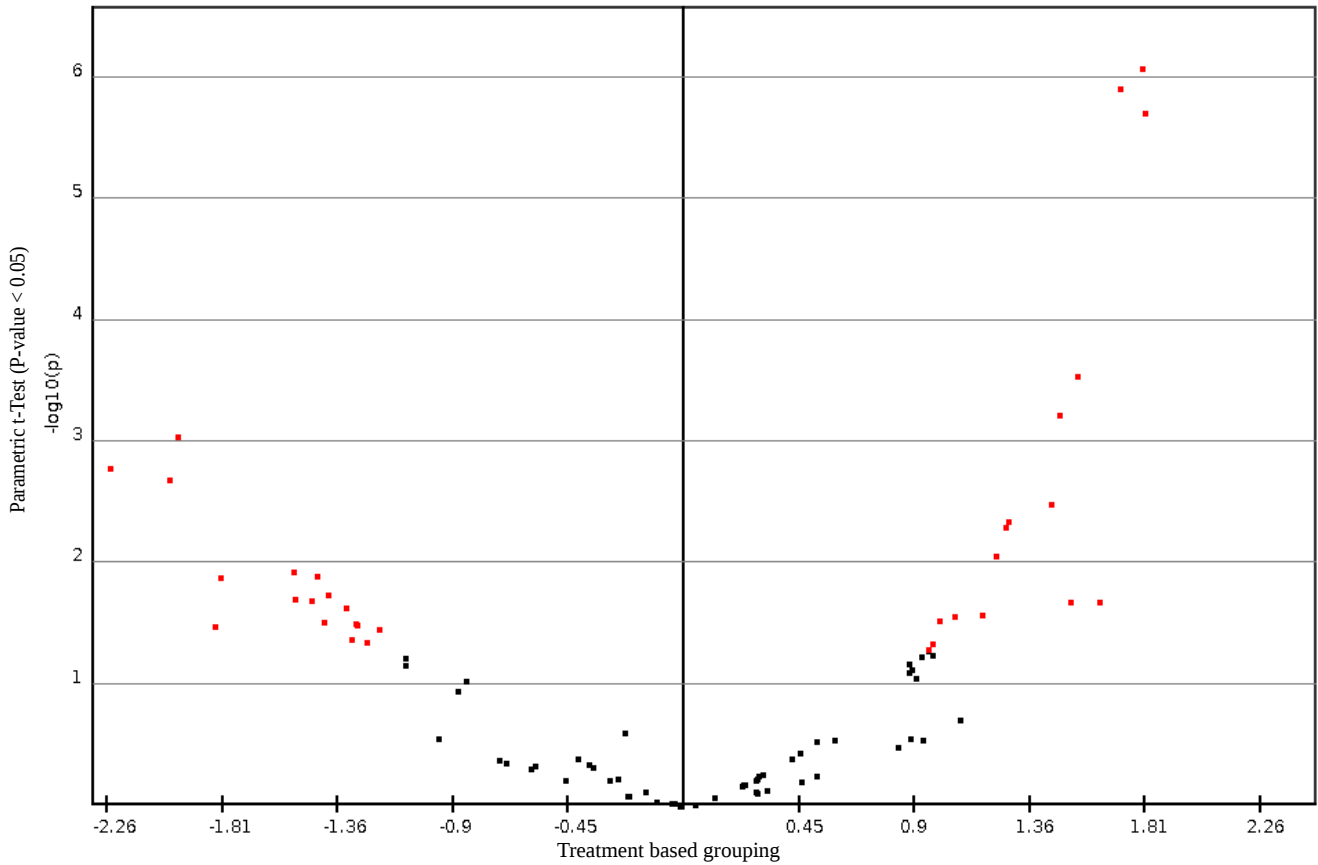

**Figure S13. Volcano plots for expression profiles based on sorghum drought responsive genes.**

This figure shows volcano plots with differential expression of genes with most significant at the top of the plot. Volcano plot (a) represents unpaired t-test based on the evaluation of tissue type contributing to the gene expression and (b) on the evaluation of treatment effect on the experimental samples. The red dots indicate a statistical significance for the up and down-regulated genes at the fold-changes (two) above which all genes have  $p < 0.01$  and below which  $p > 0.01$ .



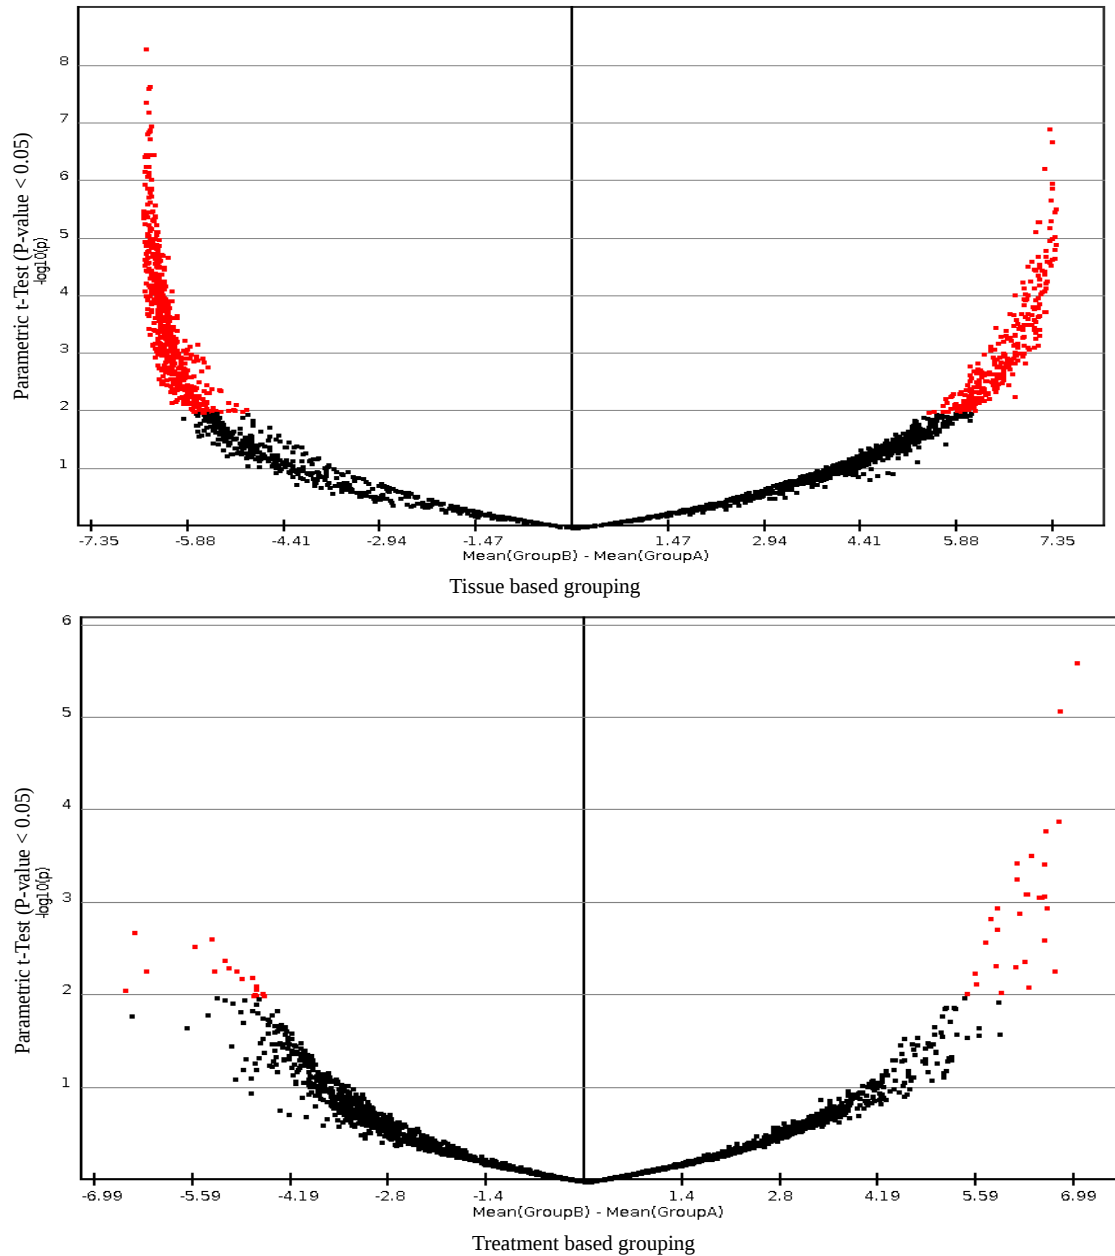

**Figure S14 Volcano plots showing expression profiles based on based on maize expression data.**

This figure describes volcano plot showing differential expression of genes with the most significant genes at the top of the plot. The red dots indicate genes-of-interest that display both large-magnitude of fold-changes (the change in mean values of group A and group B, in our case, x-axis) and a fairly high value of statistical significance (-log<sub>10</sub> of p-value, y-axis). The upper line

across the plot shows a point where  $p = 0.01$  (i.e. where the fold-change is equal to two ( $\log_2 = 1$ )) above which lie all genes having  $p < 0.01$  and below which having  $p > 0.01$ . Volcano plots a) represent unpaired t-test based on treatment grouping, b) depicts the gene expression pattern based on between subject variance with tissue based grouping of samples. The plot shows higher number of genes expressed under drought condition in tissue based grouping with more down-regulated tissue specific genes than in treatment based grouping which shows not only relatively fewer number of genes expressed in total under the same stress condition but also relatively less down-regulated genes.

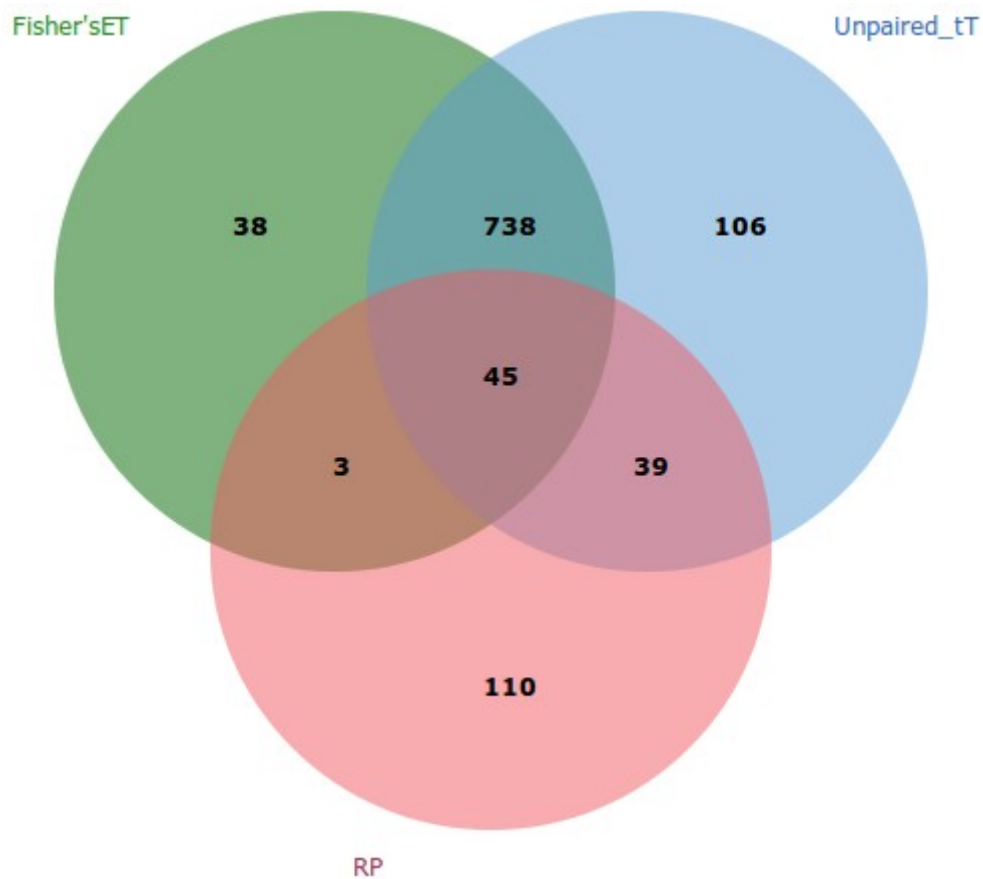

**Figure S15 Venn diagram showing distribution of significantly expressed genes.**

Key to legend: Fisher's ET = Fishers Exact Test; Unpaired tT = Unpaired t test and RP = Rank product. The figure illustrates the number of statistically significantly expressed genes identified by each statistical model which is equivalent to the sum of values in each respective circle. An overlapping shows the number of significantly expressed genes supported by multiple models. The number at the centre represents a total number of expressed genes supported by all statistical models.

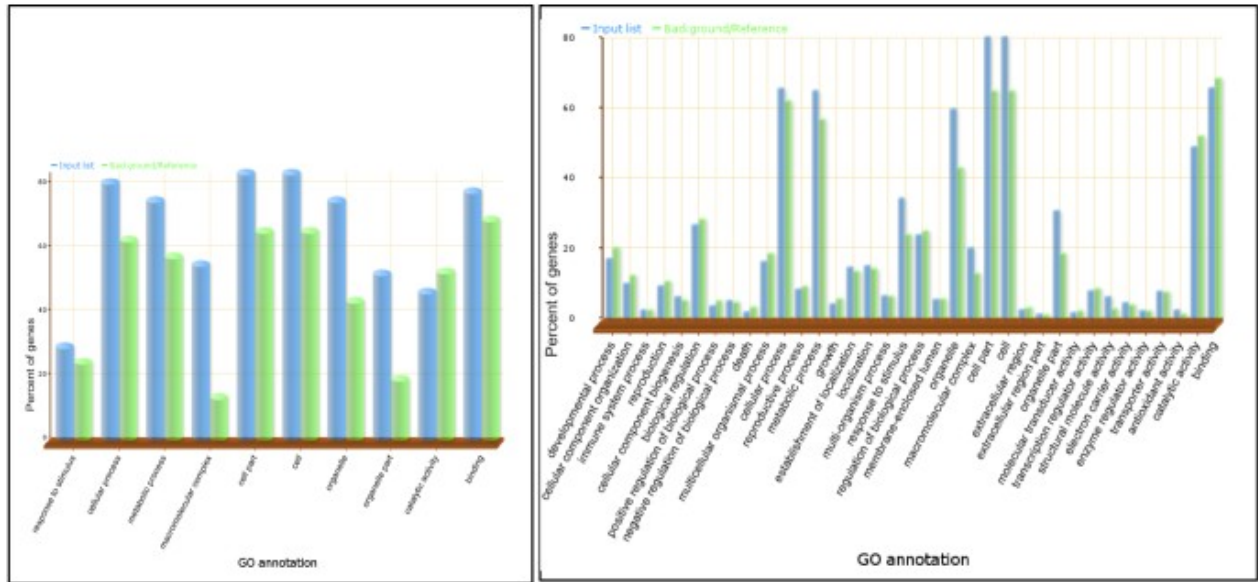

**Figure S16 Sorghum % GO-terms assigned genes identified from maize orthologs.**

Significantly expressed 45 genes supported by all statistical models based on analysis of gene-expression are shown (left) and significantly expressed total 1079 genes supported by individual statistical models based on analysis of gene-expression are also shown (right). The percentage of sorghum genes identified from maize orthologs that were assigned to different GO-terms associated to drought responses are also shown on gene expression in maize reproductive and Leaf meristem tissue.

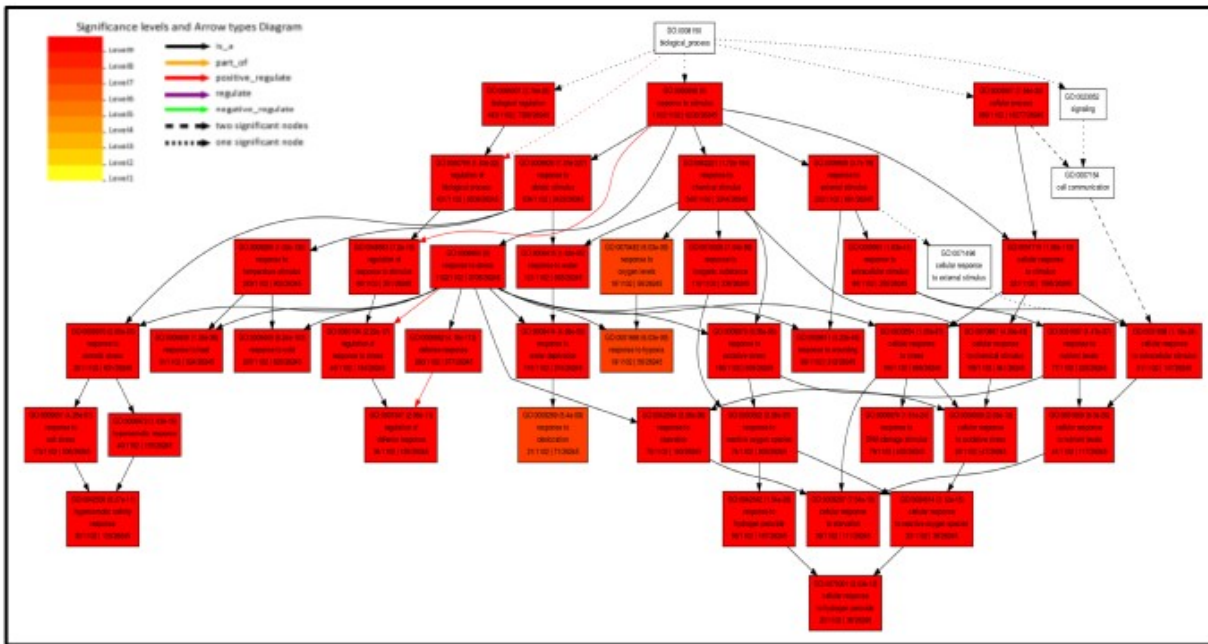

**Figure S17 Mapping of GO terms related to responses to drought stress based on the biological process of the genes identified using orthology groups.** This figure represents significantly overrepresented GO-terms most related to drought tolerance selected based on tree traversing mode using AGRIGO software package. The GO term descriptors that related to drought tolerance included but not limited to “response to drought stress”, “response to desiccation tolerance”, “response to water deprivation”, “cellular response to drought stress”, “cellular response to desiccation” and “cellular response to water deprivation”. Drought stress regulated genes were represented as an expression of mRNAs with more than two-fold changes under differential conditions. The number inside the coloured box represent GO accessions, p-values, number of enriched genes in the test set per total number of genes involved in the test set and those in the sorghum database associated with GO-term per total number of genes in the database involved in the background set of the GO-term.
