# Supplementary material for: An integrated and comparative approach towards identification, characterization and functional annotation of candidate genes for drought tolerance in sorghum (Sorghum bicolor (L.) Moench)
Source: BMC Genet. 2017 Dec 22;18:119. doi: 10.1186/s12863-017-0584-5 (PMC5741957; doi:10.1186/s12863-017-0584-5)
Supplement: Supplementary file 14 — Description of UniGene to genome mapping. (XLSX 331 kb) [file 12863_2017_584_MOESM14_ESM.xlsx]

## Sheet: Description of UniGene to genom
Additional_file_14: Description of UniGene to genome mapping
cluster id	annotation overlaps	genome hits	est accession
Sbi.8694	0	1
Sbi.6590	0	1	CF756060 CF756134
Sbi.16514	0	2
Sbi.13038	0	1
Sbi.13039	0	1
Sbi.542	0	1
Sbi.2345	0	3775
Sbi.10562	0	1	BE593283 BE593698
Sbi.20008	0	1
Sbi.14775	0	1
Sbi.6711	0	2	CF758876
Sbi.6716	0	1	CF759094
Sbi.7304	0	1	CF758198 CF761223
Sbi.10893	0	2
Sbi.19912	0	1
Sbi.12803	0	1
Sbi.20044	0	1
Sbi.10489	0	1
Sbi.12285	0	1
Sbi.19955	0	1
Sbi.19959	0	1
Sbi.5694	0	1
Sbi.10385	0	2
Sbi.17866	0	1
Sbi.20888	0	2
Sbi.20887	0	1
Sbi.11382	0	2	CF756711 CF759072 CF759209 CF761036 CF761167
Sbi.6574	0	2	CF757169
Sbi.11444	0	2
Sbi.12431	0	1
Sbi.14127	0	1	AW746224 AW746315 CF761986
Sbi.708	0	4655
Sbi.2792	0	12
Sbi.17840	0	2	AW678313 AW678574 AW924474 BE363775 BE593720 BE593190 BG933338 CF756512 CF756523 CF756595 CF756604 CF756719 CF757653 CF759410 CF760675 CF772646 CF772693 AW678362 AW678379 AW678689 AW745459 AW745651 AW746877 AW747700 AW925145 BE593612
Sbi.11856	0	1	AW746166 AW746576 AW746684 AW746043
Sbi.13289	0	3
Sbi.11446	0	1
Sbi.5569	0	1
Sbi.20335	0	3
Sbi.4517	0	1
Sbi.19421	0	1
Sbi.13110	0	222
Sbi.12697	0	1
Sbi.8874	0	1
Sbi.954	0	1
Sbi.8637	0	1
Sbi.18784	0	1	CF759445 CF769696 CF769771
Sbi.3180	0	5
Sbi.19100	0	1
Sbi.21541	0	1	CF761907
Sbi.11218	0	2
Sbi.6813	0	1	CF761757 CF771929
Sbi.698	0	1
Sbi.16820	0	1	CF757431 CF758068
Sbi.6652	0	1	CF757529
Sbi.19433	0	1	CF756843 CF760184
Sbi.20614	0	1
Sbi.10619	0	1	AW746352 AW924107
Sbi.11949	0	1	AW680084 AW680086 BG933038 BG933362 BG933036 BG933367
Sbi.4844	0	3	CF760049
Sbi.13551	0	1
Sbi.6175	0	2
Sbi.14850	0	2	CF757457 CF758418 CF760170 CF760767 CF769891 CF769803
Sbi.6615	0	1	CF756849 CF760158
Sbi.6617	0	1	CF756898 CF772006
Sbi.7692	0	1
Sbi.7873	0	2
Sbi.12537	0	1
Sbi.13963	0	1
Sbi.13967	0	47
Sbi.7418	0	1	CF771414 CF772015 CF772154
Sbi.7417	0	1	CF771495 CF771973 CF772094
Sbi.18110	0	3
Sbi.19867	0	2
Sbi.6429	0	1	CF769535 CF770498 CF770589 CF769618
Sbi.18873	0	3
Sbi.2103	0	1
Sbi.6117	0	1	AW680270 AW924187
Sbi.2355	0	1
Sbi.9827	0	1
Sbi.16690	0	2
Sbi.2915	0	1
Sbi.17125	0	1
Sbi.634	0	1	BE592844 BG933173
Sbi.6322	0	4	CF771994 CF772098
Sbi.5573	0	1
Sbi.2507	0	4
Sbi.6463	0	3	CF760034 CF760861 CF769562 CF769643 CF769670 CF772748 CF769746
Sbi.19439	0	1	CF757779
Sbi.311	0	1	BE593535 BE593329
Sbi.12312	0	1	BE593765 BE594076 CF761463
Sbi.5701	0	1
Sbi.232	0	10	AW680321 AW924255
Sbi.13048	0	5
Sbi.17964	0	1	AW924707 BE363790
Sbi.19388	0	2	CF758435
Sbi.11397	0	1	AW680293 AW924226
Sbi.18014	0	1
Sbi.17396	0	1
Sbi.9415	0	1	AW679270 CF769367
Sbi.10579	0	1	BE592147
Sbi.13379	0	5	BE593965
Sbi.5940	0	2
Sbi.10490	0	1
Sbi.1780	0	1
Sbi.244	0	2	AW746225 AW746314
Sbi.5554	0	1
Sbi.19452	0	1	CF759565 CF761915
Sbi.2440	0	112
Sbi.19092	0	1
Sbi.6755	0	1	CF761328
Sbi.316	0	2	BE594178
Sbi.13816	0	2
Sbi.2012	0	1
Sbi.19115	0	1	CF771394 CF771403 CF771404
Sbi.6661	0	5	CF757666 CF759405 CF761108
Sbi.16031	0	1
Sbi.2803	0	4	CF760143
Sbi.253	0	1	AW747168
Sbi.13989	0	1	CF759093 CF759217
Sbi.357	0	2
Sbi.21145	0	1
Sbi.21142	0	3
Sbi.19150	0	1
Sbi.12902	0	2
Sbi.17354	0	1
Sbi.8886	0	1
Sbi.393	0	2
Sbi.21598	0	1118
Sbi.9741	0	1
Sbi.13561	0	1	CF760364
Sbi.13563	0	2
Sbi.6411	0	1	CF771918
Sbi.10053	0	1
Sbi.10052	0	1
Sbi.17203	2	1
Sbi.18002	2	2	BE593645 BE593233
Sbi.15487	2	1
Sbi.19952	2	1
Sbi.2892	2	1
Sbi.6793	2	1371	CF770857 CF771671
Sbi.913	2	1
Sbi.11638	2	1
Sbi.18900	2	1
Sbi.13112	2	1
Sbi.5618	2	1
Sbi.4252	2	1
Sbi.19512	2	1
Sbi.11750	2	4
Sbi.20028	2	1
Sbi.2317	2	1
Sbi.10926	2	1
Sbi.7912	2	1
Sbi.11550	2	1
Sbi.8849	2	1
Sbi.12748	2	1
Sbi.10905	2	6	CF757402 CF758992 CF759946 CF759947
Sbi.551	2	1	AW677778 AW677868 AW678527 AW678486 BE592318 BE593336 BE593542 BE593009 CF756798 CF757451 CF758238 CF759249 CF759563 CF759737 CF760705 CF771383 CF772251
CF772529
Sbi.20010	2	1
Sbi.17498	2	1
Sbi.17973	2	1
Sbi.2450	2	2
Sbi.7203	2	1	CF755716 CF755802
Sbi.17602	2	2
Sbi.6803	2	1	CF771450
Sbi.20815	2	2
Sbi.2556	2	1
Sbi.2552	2	1
Sbi.980	2	2
Sbi.14472	2	1
Sbi.17439	2	1
Sbi.9786	4	2
Sbi.7205	4	1	CF755913 CF755980 CF760911 CF769797 CF769887 CF770775 CF770690
Sbi.7423	4	2	CF769883 CF769969 CF772318
Sbi.18417	4	1	AW679117
Sbi.2347	4	1
Sbi.21357	4	1	CF758885 CF759376 CF769991 CF770076
Sbi.19689	4	1
Sbi.21185	4	1
Sbi.19213	4	2
Sbi.567	4	1	AW678768 AW678861 AW678620 CF757695 CF760509 CF769824 CF769910 CF770334 CF770417
Sbi.2367	4	1
Sbi.10091	4	2	CF760065
Sbi.20022	4	1
Sbi.9872	4	1
Sbi.11327	4	1
Sbi.12795	4	1
Sbi.7608	4	1
Sbi.7469	4	3
Sbi.4476	4	1
Sbi.11422	4	1	AW680845 AW680831 BE594096 BE593782
Sbi.8711	4	1
Sbi.20042	4	1
Sbi.20049	4	1
Sbi.20048	4	1
Sbi.436	4	1
Sbi.21497	4	1
Sbi.1627	4	1	BE592404
Sbi.9587	4	1
Sbi.7251	4	1	CF756376 CF756462 CF757230 CF758645
Sbi.7380	4	1	CF759100 CF759144 CF760047 CF761263 CF770661 CF770749
Sbi.3105	4	3
Sbi.19951	4	2
Sbi.1997	4	1
Sbi.6779	4	1	CF769863 CF769949
Sbi.16290	4	3	CF772212
Sbi.12457	4	7
Sbi.18945	4	1
Sbi.19547	4	1
Sbi.20084	4	4
Sbi.2772	4	1
Sbi.19802	4	1
Sbi.10718	4	1	AW680940 AW681072 CF771332
Sbi.3314	4	1
Sbi.19524	4	1
Sbi.20040	4	1
Sbi.19889	4	1
Sbi.19882	4	13
Sbi.19886	4	1
Sbi.20129	4	2
Sbi.589	4	1	AW746589 AW746687
Sbi.15751	4	1	AW679119 AW745881 CF760607 EB725674
Sbi.17486	4	1
Sbi.19931	4	1
Sbi.11406	4	1
Sbi.6696	4	1	CF758333
Sbi.16048	4	1
Sbi.19365	4	6
Sbi.11247	4	1
Sbi.17303	4	3
Sbi.11225	4	2
Sbi.19168	4	12
Sbi.6037	4	1
Sbi.18818	4	1
Sbi.2295	4	1
Sbi.19742	4	2
Sbi.11561	4	1
Sbi.4334	4	1
Sbi.20988	4	2
Sbi.7038	4	1	CF759484 CF759700 CF761198
Sbi.12763	4	1
Sbi.9757	4	1
Sbi.16732	4	3
Sbi.19986	4	1
Sbi.10025	4	1
Sbi.16716	4	1
Sbi.17045	4	1
Sbi.21404	4	4
Sbi.5150	4	1
Sbi.16758	4	1
Sbi.21347	4	1
Sbi.9794	4	1
Sbi.21641	4	1
Sbi.20003	4	1
Sbi.10691	4	1	AW678653 AW678791 AW678732
Sbi.6580	4	1	CF755725 CF755809 CF760135 CF772119
Sbi.8755	4	6
Sbi.20900	4	1
Sbi.21624	4	1
Sbi.21623	4	1
Sbi.17796	4	1
Sbi.12311	4	1
Sbi.5702	4	1
Sbi.21606	4	1
Sbi.21609	4	1
Sbi.19908	4	1
Sbi.19901	4	1
Sbi.21018	4	1
Sbi.6726	4	1	CF759920
Sbi.20518	4	1	AW680187 BE593987
Sbi.12662	4	1
Sbi.4489	4	1
Sbi.8105	4	1
Sbi.17252	4	1
Sbi.7373	4	1	CF769341 CF769425 CF770390 CF770307
Sbi.20891	4	2
Sbi.11624	4	2
Sbi.8986	4	1
Sbi.12187	4	2209
Sbi.21539	4	1	CF760985
Sbi.12401	4	1
Sbi.4997	4	2
Sbi.10823	4	1
Sbi.16052	4	1	CF771774
Sbi.9228	4	1
Sbi.128	4	1
Sbi.10108	4	1
Sbi.3626	4	1
Sbi.13314	4	4
Sbi.6660	4	1	CF757615 CF758768
Sbi.21168	4	1
Sbi.7276	4	1	CF755756 CF755838 CF757821 CF761797 CF769850 CF769936
Sbi.11433	4	3	CF772753
Sbi.10863	4	2
Sbi.16014	4	1
Sbi.2821	4	1
Sbi.1884	4	2
Sbi.2284	4	1
Sbi.1188	4	2
Sbi.10352	4	2
Sbi.20464	4	1	BE592507
Sbi.11763	4	1	BE593130 BE593441
Sbi.21591	4	1
Sbi.10017	4	1
Sbi.2097	4	1
Sbi.7352	4	1	CF769552 CF769623 CF769632 CF769847 CF769933 CF770656 CF770744 CF769540
Sbi.7350	4	1	CF769515 CF769600
Sbi.7826	4	1
Sbi.17426	4	5
Sbi.2112	4	2
Sbi.19874	4	2
Sbi.19878	4	1
Sbi.11502	4	1
Sbi.356	5	1
Sbi.546	5	1
Sbi.20005	5	1
Sbi.21186	5	1	CF771000 CF772430
Sbi.19746	5	1
Sbi.2363	5	1
Sbi.197	5	1	AW680123 BG933566
Sbi.7464	5	1
Sbi.6732	5	1	CF758737 CF760233
Sbi.7754	5	1	CF758775
Sbi.21238	5	1
Sbi.10561	5	1	BE593693 BE593277 CF759822 CF761104
Sbi.5068	5	1
Sbi.8322	5	1
Sbi.21358	5	1
Sbi.10732	5	1	AW679957
Sbi.14105	5	1	AW747467 CF756899 CF758457 CF759313 CF760253 CF769645 CF769723
Sbi.16423	5	1
Sbi.932	5	2
Sbi.326	5	1	BM317817
Sbi.7546	5	1
Sbi.19339	5	4
Sbi.20198	5	1
Sbi.2424	5	1
Sbi.9718	5	1
Sbi.12725	5	1
Sbi.10964	5	1
Sbi.17347	5	1
Sbi.20675	5	1
Sbi.15078	5	1	AW680757 AW680892 CF759126 CF759488 CF771230
Sbi.2647	5	1
Sbi.19451	5	1	CF759048 CF760793 CF760869
Sbi.2126	5	1
Sbi.12373	5	1	CF759461
Sbi.4391	5	1	CF756970
Sbi.12352	5	1
Sbi.16693	5	4
Sbi.19419	5	1
Sbi.2910	5	1
Sbi.574	5	1	AW745787 AW745822
Sbi.19926	5	1
Sbi.10457	5	1
Sbi.12641	5	1
Sbi.4910	5	2
Sbi.20050	5	2
Sbi.13984	5	1	CF758117 CF770021 CF770105
Sbi.10186	5	1	CF758491
Sbi.12605	5	1	AW679574 BG933410
Sbi.5831	5	1	AW680276
Sbi.4623	5	1	AW680007 AW745404
Sbi.4998	5	1
Sbi.10925	5	1
Sbi.21517	5	1
Sbi.19119	5	1
Sbi.8766	5	1
Sbi.14078	5	1	AW679609 AW680363 AW680095 AW680098 AW745799 AW745725 AW924345 BE363487 BG933056 BG933342 BG933470
Sbi.7239	5	1	CF756850 CF758906 CF769972 CF770057
Sbi.19885	5	1
Sbi.12717	5	1
Sbi.21473	5	1
Sbi.21418	5	1
Sbi.8460	5	1
Sbi.10057	5	1
Sbi.18867	6	1
Sbi.8331	6	2
Sbi.20009	6	1
Sbi.5757	6	2
Sbi.19428	6	1	CF755726 CF755810
Sbi.9104	6	1	CF758399
Sbi.272	6	1	AW747483 AW747449 CF771912 CF771913 CF771914 CF772668
Sbi.10168	6	1
Sbi.5100	6	1
Sbi.1601	6	1	AW746689 AW746615
Sbi.20741	6	1	CF757427 CF759178 CF761256 CF761362 CF769832 CF769845 CF769917 CF770141 CF770171 CF770202 CF770221 CF770247 CF770278 CF770378 CF770389 CF770459 CF770877 CF770961 CF770963 CF770981 CF771083 CF771145 CF771233 CF771288 CF771364 CF771380 CF771390 CF771533 CF771550 CF771582 CF771632 CF771763 CF771802 CF771803 CF771951 CF771954 CF772163 CF772194 CF772358 CF772509 CF772519 CF772576 CF772805 CF772855 CF7…
Sbi.1143	6	1
Sbi.20045	6	1
Sbi.11349	6	1
Sbi.19971	6	1
Sbi.16964	6	1
Sbi.13228	6	1
Sbi.6537	6	1	CF771977
Sbi.10750	6	1	AW678215 AW678297
Sbi.15699	6	1
Sbi.4904	6	1
Sbi.13159	6	1
Sbi.7838	6	1
Sbi.7839	6	1
Sbi.2271	6	1
Sbi.9930	6	1
Sbi.19957	6	1
Sbi.19954	6	2
Sbi.262	6	1	AW745797 AW746815 AW746756
Sbi.6776	6	1	CF769780 CF769789 CF769707 CF769718
Sbi.18493	6	1	AW925025
Sbi.10717	6	1	AW681203
Sbi.9996	6	1
Sbi.9400	6	2	CF759786
Sbi.874	6	1
Sbi.6890	6	1	CF757799 CF760676
Sbi.19297	6	1
Sbi.13369	6	1	AW747539 AW924916
Sbi.8865	6	1
Sbi.2235	6	1	CF770266 CF772698
Sbi.17466	6	1
Sbi.19624	6	1
Sbi.11203	6	1
Sbi.10335	6	1	CF759743
Sbi.1241	6	1
Sbi.5568	6	1
Sbi.16063	6	3
Sbi.12993	6	1	CF760288 CF760427 CF760428
Sbi.4515	6	1
Sbi.12190	6	1
Sbi.19936	6	1
Sbi.2903	6	1
Sbi.13362	6	1	AW746938 AW746956
Sbi.17581	6	1
Sbi.5584	6	1
Sbi.9006	6	1
Sbi.155	6	1
Sbi.7627	6	1
Sbi.21560	6	1
Sbi.11241	6	1
Sbi.6264	6	1	AW678939 AW679648 AW747583 AW747619 AW925008 AW924972 CF758698 CF759779 CF760958 CF772484
Sbi.3373	6	2
Sbi.11652	6	1
Sbi.14303	6	1
Sbi.9042	6	1
Sbi.6658	6	3	CF757586 CF761945 CF770006 CF770090
Sbi.1384	6	3
Sbi.4860	6	1	CF759626 CF772471
Sbi.19430	6	1	CF756368
Sbi.5643	6	1
Sbi.7718	6	1
Sbi.15053	6	1	AW678980 AW678949
Sbi.9765	6	1	CF760092 CF760101
Sbi.2996	6	1
Sbi.418	6	1	CF758818 CF759097
Sbi.19998	6	1
Sbi.12917	6	1
Sbi.14107	6	1	CF759455 CF760846 CF772687
Sbi.17419	6	1
Sbi.10280	6	1
Sbi.8908	6	1
Sbi.5641	6	1
Sbi.1772	6	1	CF757971
Sbi.5672	6	1
Sbi.14012	6	1
Sbi.10369	6	1
Sbi.15626	6	1
Sbi.4823	6	1
Sbi.4310	6	1
Sbi.19264	6	1
Sbi.21301	6	1
Sbi.1752	6	1
Sbi.12545	6	1
Sbi.11733	6	1
Sbi.5818	6	2	AW677878 AW677786 CF758837
Sbi.17102	6	1
Sbi.5158	6	1
Sbi.5376	6	2
Sbi.9083	6	1	AW746083
Sbi.13025	6	1
Sbi.12509	6	1
Sbi.9533	6	4
Sbi.8041	6	1	AW678508 AW678570 AW680776
Sbi.12813	6	2
Sbi.17882	6	1	AW681140 AW680978 CF757005
Sbi.14501	6	1	AW680361 AW924342 BE592587 BE592710 CF758289 CF760765
Sbi.6460	6	1	AW680590 AW681078 AW745733 AW745863 AW747785 AW923960 AW925222 BE592293
BG933108 CF758628 CF772719
Sbi.19923	6	1
Sbi.19925	6	1
Sbi.14208	6	1	AW679671 AW746367 AW745944 AW925161 AW924032 BE593183 BE593494 BE594079 BE593768 BG933437 CF757312 CF757384 CF757447 CF758116 CF758329 CF761333 CF761409 CF770551 CF770638 CF770645 CF770734
Sbi.1942	6	1
Sbi.4395	6	1
Sbi.17535	6	1
Sbi.21604	6	3
Sbi.19902	6	1
Sbi.16482	6	1
Sbi.7678	6	1
Sbi.3	6	1
Sbi.19630	6	1
Sbi.20942	6	1
Sbi.12877	6	1
Sbi.2269	6	1
Sbi.12123	6	4	AW679226 AW679307
Sbi.18381	6	1	AW677822 AW680424 AW680582 AW680743 AW677829 AW677892 AW679337 AW746539 AW747613 AW747692 AW746483 AW924293 AW924779 AW924891 AW924425 AW924687 AW925002 BE363712 BE363792 BE594064 BE593752
Sbi.11589	6	1
Sbi.8251	6	1
Sbi.6743	6	1
Sbi.9005	6	1
Sbi.8744	6	1
Sbi.19730	6	2
Sbi.3112	6	1
Sbi.5072	6	1
Sbi.6762	6	1	CF761820
Sbi.17338	6	1
Sbi.20094	6	1
Sbi.8741	6	1
Sbi.11842	6	1	AW678652 AW678867 AW678911 AW678999 AW678731 AW678903
Sbi.9192	6	1	CF758194 CF759856
Sbi.9195	6	1	CF759656
Sbi.18939	6	1
Sbi.5556	6	1
Sbi.10243	6	1	CF757626
Sbi.8661	6	2
Sbi.6547	6	1	CF757010 CF772566
Sbi.13831	6	2
Sbi.13835	6	1
Sbi.15999	6	1
Sbi.319	6	1	BE592711 BE592588
Sbi.19134	6	1
Sbi.6686	6	1	CF758178 CF758636
Sbi.5014	6	1
Sbi.9846	6	1	AW680949 EB725804
Sbi.9226	6	1
Sbi.11417	6	2
Sbi.3193	6	1
Sbi.251	6	1	AW747024 BE593269 BE593686
Sbi.20530	6	1	AW745776
Sbi.11922	6	1	AW679047 AW747207 BE593169 BE593479 CF771693
Sbi.7343	6	1	CF758572 CF761738
Sbi.6826	6	1	CF772442
Sbi.19482	6	1
Sbi.19151	6	1
Sbi.2535	6	1
Sbi.10339	6	2
Sbi.9934	6	1
Sbi.7506	6	1	CF770820 CF772876
Sbi.8880	6	1
Sbi.21109	6	1
Sbi.10608	6	3	AW746407 AW924103
Sbi.7910	6	1
Sbi.2865	6	1	BE594241
Sbi.4327	6	1
Sbi.1729	6	1	CF758661
Sbi.13728	6	1
Sbi.7217	6	1	AW680245 AW747107 AW747020 BE363418 BE363631 BE363326 CF756187 CF756275 CF759148 CF771494
Sbi.13540	6	1
Sbi.11943	6	1	BE592370 BE593054
Sbi.19995	6	1
Sbi.20256	6	1
Sbi.19856	6	3
Sbi.10033	6	1
Sbi.17169	6	1	CF760783
Sbi.19645	6	1
Sbi.6129	6	1
Sbi.5372	7	1	CF769646 CF769724
Sbi.15884	7	1
Sbi.7448	7	1	CF761615 CF770341 CF771719 CF770424
Sbi.2712	7	1
Sbi.10259	7	2
Sbi.17373	7	1
Sbi.13054	7	1
Sbi.17405	7	1
Sbi.13631	7	1
Sbi.4532	7	1
Sbi.13869	7	1
Sbi.19355	7	1
Sbi.990	7	1
Sbi.12242	7	1
Sbi.11206	7	1
Sbi.4849	7	1
Sbi.17479	7	1	CF759476
Sbi.13559	7	1
Sbi.20188	7	1
Sbi.5443	7	1
Sbi.14817	7	1
Sbi.18320	7	1
Sbi.3986	7	1
Sbi.6704	7	1	CF758460
Sbi.13687	7	1
Sbi.20554	7	2	AW924355
Sbi.20047	7	1
Sbi.19718	7	1
Sbi.2416	7	1
Sbi.20119	7	2	AW679552 BG933093
Sbi.3643	7	1	CF757756 CF757757
Sbi.7337	7	1	CF757018 CF760712 CF761128 CF761129 CF761137 CF761138 CF761139 CF761148 CF761149 CF761159 CF772445
Sbi.20171	7	1
Sbi.256	7	1	AW747343 AW747265
Sbi.9248	7	1
Sbi.21220	7	1
Sbi.19665	7	1	AW680163 BG933488
Sbi.968	7	1
Sbi.11709	7	1
Sbi.19641	7	1
Sbi.20219	8	1
Sbi.11062	8	1
Sbi.5164	8	2
Sbi.5161	8	1
Sbi.18673	8	1
Sbi.18419	8	1	AW679498
Sbi.15790	8	1	CF761580
Sbi.14828	8	1
Sbi.19685	8	1
Sbi.7990	8	1	CF757901 CF761310 CF761575
Sbi.20764	8	7
Sbi.997	8	1
Sbi.9662	8	2	CF759534 CF761567
Sbi.16980	8	1
Sbi.13015	8	1
Sbi.12828	8	1
Sbi.1852	8	1
Sbi.228	8	1	AW679678 AW923875 AW924001 CF756722 CF761835
Sbi.20702	8	2
Sbi.14097	8	1
Sbi.15149	8	1	AW746574 BE363332
Sbi.15144	8	1	AW746386
Sbi.1608	8	1	AW925218
Sbi.5122	8	1
Sbi.6736	8	2	CF758815 CF760521 CF760528
Sbi.12674	8	1
Sbi.21391	8	1
Sbi.7362	8	1	CF769858 CF769944
Sbi.13195	8	1	CF770324 CF770408
Sbi.11594	8	1
Sbi.11319	8	1
Sbi.8828	8	1
Sbi.3107	8	1
Sbi.12280	8	2	BE592659 BE638198
Sbi.18396	8	1	AW679625 BG933457 CF757249 CF757424
Sbi.7136	8	1	CF757315 CF771672
Sbi.1993	8	3
Sbi.1992	8	1
Sbi.15265	8	1	BM317795
Sbi.896	8	1	CF771654
Sbi.2894	8	1	CF756689
Sbi.10170	8	1	CF760881
Sbi.6794	8	1	CF770864 CF772883
Sbi.1929	8	1
Sbi.14128	8	1	AW678858 AW678618 AW678761
Sbi.3316	8	1
Sbi.19520	8	1
Sbi.17844	8	1	AW680199 AW680298 AW747511 AW747395 AW924365 AW924047 AW924189 AW924214 BE363760 BE593899 BE594010 BE594218 CF772535
Sbi.2236	8	1
Sbi.11859	8	1	AW679722 AW746752 AW746811 BE593111 BM317779
Sbi.20006	8	1
Sbi.11282	8	2
Sbi.1244	8	1	AW677667 AW677679 AW677724 AW677782 AW677792 AW678058 AW678069 AW678089 AW678096 AW678139 AW678146 AW678171 AW678234 AW678317 AW678495 AW678597 AW678655 AW678738 AW678798 AW678821 AW678823 AW678866 AW678873 AW678912 AW678914 AW678938 AW678985 AW679175 AW679230 AW679255 AW679305 AW679878 AW679924 AW680058 AW680418 AW680460 AW680547 AW680708 AW681084 AW677702 AW677714 AW677716 AW677874 AW677994 AW6…
Sbi.5566	8	1
Sbi.4966	8	1
Sbi.17210	8	1
Sbi.18047	8	1	AW747428 CF760093
Sbi.21501	8	1
Sbi.3513	8	1	AW745627 AW745685 AW746084 AW746122 AW747261 AW747354 BE592320 BE592373 BE593012
Sbi.11035	8	1
Sbi.11097	8	1
Sbi.11095	8	1
Sbi.12420	8	2
Sbi.10443	8	1
Sbi.8916	8	1
Sbi.15098	8	1	AW679004 CF757553
Sbi.11935	8	1	BE592166 BE592170
Sbi.2029	8	1
Sbi.20765	8	1
Sbi.10304	8	4
Sbi.4738	8	1
Sbi.178	8	1	AW677966 AW679698 AW745500 AW747176 CF757327 CF757661 CF760365 EB725800
Sbi.17308	8	1
Sbi.14300	8	1
Sbi.14302	8	2
Sbi.5637	8	1
Sbi.4276	8	1
Sbi.5723	8	1
Sbi.7315	8	1	CF756162 CF756250 CF756871 CF757430 CF758373 CF758627 CF759610 CF759758
CF761702 CF769685 CF769761 CF770862 CF772002 CF772896
Sbi.14188	8	1	AW747726 AW925150 CF755887 CF755907 CF755908 CF755967 CF755968
CF755975 CF755976 CF755983 CF755897 CF755898 CF755918 CF755958
Sbi.11974	8	1	BE592864 BG933194
Sbi.18765	8	1
Sbi.19634	8	1
Sbi.15645	8	1
Sbi.18155	8	1	AW680192 AW678398 BE593178 BE593489 BG933512
Sbi.13736	8	1	CF759699
Sbi.11775	8	1	AW747074 EB725690
Sbi.10422	8	1
Sbi.17086	8	1
Sbi.6978	8	1	AW678042 AW747283 AW747333 AW747630 AW746888 AW925021 AW923877 BE363501 BE593033 BM317801 CF756018 CF756098 CF757622 CF759079 CF760174 CF761839
Sbi.18132	8	1	CF755729 CF755813 CF756394 CF756480 CF756511 CF759174 CF759653
Sbi.3969	8	1	CF769363 CF769445 CF771099 CF771798
Sbi.1326	8	1
Sbi.19863	8	1
Sbi.3061	8	1
Sbi.19471	8	1	CF769744
Sbi.8686	8	1
Sbi.10901	8	169
Sbi.4424	8	1
Sbi.4355	8	3	BE593341 BE593547
Sbi.9534	8	1
Sbi.5749	8	1
Sbi.11921	8	1	BE592328 BE593018 CF759991
Sbi.21640	8	2
Sbi.8040	8	1	AW679877 AW679858 BE363412 BE363328
Sbi.1675	8	1
Sbi.1448	8	1
Sbi.5720	8	1
Sbi.20574	8	1	BE593663
Sbi.7479	8	1
Sbi.12318	8	1
Sbi.20325	8	2
Sbi.10086	8	1	BG933549
Sbi.20380	8	1	CF771641
Sbi.21605	8	2
Sbi.19906	8	1
Sbi.12661	8	1
Sbi.11401	8	1	AW746917
Sbi.13049	8	1
Sbi.19967	8	1
Sbi.3724	8	1	BG933071 BG933324
Sbi.6290	8	1	CF756838 CF757932
Sbi.14606	8	1
Sbi.5139	8	1
Sbi.1210	8	1
Sbi.17641	8	1
Sbi.2242	8	1
Sbi.19941	8	2
Sbi.4238	8	1
Sbi.9066	8	1
Sbi.276	8	1	AW679976 AW745369
Sbi.6502	8	1	CF759130 CF770245 CF770169
Sbi.19	8	1
Sbi.11169	8	1
Sbi.10396	8	1
Sbi.9191	8	1	CF757122
Sbi.2412	8	1
Sbi.21261	8	4
Sbi.5557	8	1
Sbi.13994	8	1	CF760741 CF760742 CF760743 CF760747
Sbi.8127	8	1
Sbi.13169	8	1	AW746450 BE363346
Sbi.6289	8	1	CF769436 CF770079
Sbi.19094	8	1
Sbi.2448	8	2
Sbi.4191	8	1	AW679958 AW745443 BE592488
Sbi.14565	8	2
Sbi.9224	8	2
Sbi.10454	8	1
Sbi.15085	8	1	AW681059 CF757145 CF758711
Sbi.3197	8	1
Sbi.21167	8	1
Sbi.10789	8	1
Sbi.6800	8	2	CF771237
Sbi.20364	8	1
Sbi.19174	8	1	CF757036
Sbi.15841	8	1
Sbi.424	8	1	CF772397
Sbi.17769	8	1	AW924610 AW924499 CF760782 CF761780 CF771208
Sbi.2828	8	1	CF759236
Sbi.10419	8	1	BE592332 BE593023
Sbi.6874	8	1	CF770298 CF770384 CF771153 CF771927
Sbi.5621	8	1
Sbi.5626	8	1
Sbi.4090	8	1
Sbi.19366	8	5
Sbi.9542	8	1
Sbi.12595	8	1	AW680089 BG933349 BG933049
Sbi.10350	8	2
Sbi.20850	8	1
Sbi.737	8	1
Sbi.4858	8	1
Sbi.2866	8	1
Sbi.2094	8	2
Sbi.16723	8	1
Sbi.19993	8	1
Sbi.21474	8	1
Sbi.17899	8	1
Sbi.7689	8	1
Sbi.1687	8	2	CF755783 CF755862
Sbi.6081	8	1
Sbi.11028	8	2
Sbi.18731	8	1
Sbi.1335	8	1
Sbi.11519	8	1
Sbi.3283	9	1
Sbi.15160	9	1	AW747651 AW746975
Sbi.12796	9	1
Sbi.20563	9	1	BE592457
Sbi.11697	9	3
Sbi.5718	9	1
Sbi.12113	9	1
Sbi.4458	9	1
Sbi.12454	9	1
Sbi.8304	9	1
Sbi.1495	9	1
Sbi.4518	9	1
Sbi.8537	9	1
Sbi.11799	9	1
Sbi.10794	9	1	BE592564
Sbi.20497	9	1	AW680079 BG933029 BG933376
Sbi.10844	9	1
Sbi.10341	9	1
Sbi.9363	9	1
Sbi.11481	9	1
Sbi.1770	9	1	AW746414
Sbi.2642	9	1
Sbi.21327	9	1
Sbi.14836	9	1
Sbi.5747	9	1
Sbi.19412	9	1
Sbi.17025	9	18
Sbi.13258	9	1
Sbi.10060	9	3
Sbi.15785	9	1
Sbi.7318	9	1	CF756894 CF758678 CF759567 CF771134
Sbi.4650	9	1
Sbi.10262	9	2
Sbi.21385	9	1
Sbi.6729	9	1	CF760084
Sbi.12484	9	1
Sbi.11939	9	1	BE593866 CF760106 CF761037
Sbi.19033	9	1
Sbi.4624	9	1
Sbi.13378	9	1	BE593650 BE593237
Sbi.3091	9	1
Sbi.8606	9	1
Sbi.17454	9	1
Sbi.13109	9	1
Sbi.19304	9	1
Sbi.8523	9	1
Sbi.10668	9	1	AW678116 AW678330 AW678196 AW679020 AW746631 CF757660 CF769691 CF769766 CF770724 CF770806 CF771424 CF772666
Sbi.16033	9	1
Sbi.21288	9	1
Sbi.8953	9	1
Sbi.252	9	1	AW747036 AW747097 CF758361 CF759394
Sbi.20365	9	2
Sbi.11084	9	1
Sbi.5623	9	7
Sbi.19626	9	1
Sbi.2613	9	1
Sbi.9802	9	1
Sbi.9090	9	1
Sbi.399	9	1
Sbi.5148	9	1
Sbi.20689	9	1	CF760159
Sbi.21337	9	1
Sbi.20361	10	1
Sbi.21431	10	2
Sbi.18312	10	2
Sbi.14239	10	1	AW680570 AW680482 CF759248 CF772574 CF772582
Sbi.20493	10	1	AW679331 AW679487
Sbi.2771	10	1
Sbi.10077	10	1
Sbi.3167	10	1
Sbi.17488	10	1
Sbi.18888	10	2
Sbi.19178	10	1
Sbi.15213	10	1	BE592343 BE593035
Sbi.4418	10	1
Sbi.13016	10	1
Sbi.20396	10	1	BE593461
Sbi.4060	10	1
Sbi.7609	10	1
Sbi.10229	10	1
Sbi.18638	10	1
Sbi.18981	10	1
Sbi.8344	10	1
Sbi.4046	10	2	CF771140 CF771149
Sbi.21237	10	1
Sbi.17645	10	1
Sbi.7268	10	1	CF755930 CF755994 CF757718
Sbi.21052	10	1
Sbi.8829	10	1
Sbi.1169	10	1	AW746339
Sbi.11815	10	1	AW678642 AW678712 BE592686
Sbi.9161	10	1
Sbi.18393	10	1	AW679761 AW680539 AW680886 AW681106 AW923926 CF756750 CF756768 CF772584
Sbi.16902	10	1
Sbi.1996	10	1
Sbi.9885	10	1
Sbi.19725	10	5
Sbi.7582	10	1
Sbi.3698	10	1
Sbi.20081	10	1
Sbi.5204	10	1
Sbi.18005	10	1
Sbi.4556	10	1
Sbi.5967	10	1
Sbi.6792	10	1	CF770804 CF770967
Sbi.5231	10	1
Sbi.4942	10	1
Sbi.6891	10	1	AW924518 AW924618 CF757736 CF760898
Sbi.11075	10	1	CF757041
Sbi.10541	10	1
Sbi.10811	10	1
Sbi.10484	10	1
Sbi.11287	10	1
Sbi.15500	10	1
Sbi.17215	10	1
Sbi.9257	10	1
Sbi.10572	10	1	BE592417 BE592543
Sbi.15093	10	1	AW678546 BE593953 BE594276 BE592327
Sbi.11424	10	1
Sbi.10430	10	1
Sbi.20809	10	1
Sbi.19101	10	2
Sbi.5282	10	1
Sbi.2813	10	1
Sbi.8943	10	1	CF759810 CF760423
Sbi.10639	10	1	AW745538 AW745493
Sbi.7902	10	1
Sbi.17753	10	1	AW679458 AW680275 AW679340 AW745760 AW745849 AW747477 AW747437 AW924883 AW924188 AW924801 BE592683 BE638214 CF758422
Sbi.12590	10	1	CF770159 CF770238
Sbi.15271	10	1
Sbi.6835	10	1	CF772670
Sbi.6635	10	1	CF757167 CF770318 CF770401 CF770402
Sbi.6634	10	1	CF757157 CF758354
Sbi.2296	10	1
Sbi.3210	10	1
Sbi.18156	10	1	CF758028
Sbi.11549	10	1
Sbi.13711	10	1
Sbi.20026	10	1
Sbi.7412	10	1	CF757760 CF761476 CF771635 CF771866 CF771953
Sbi.3254	10	1
Sbi.9316	10	1
Sbi.17290	10	1	CF770300 CF770666
Sbi.11906	10	1	AW924409 BE363701 BE363312
Sbi.7438	10	1	CF770902 CF772863 CF772864
Sbi.5487	10	2
Sbi.11472	10	1
Sbi.17801	10	1	AW747026
Sbi.21428	10	1
Sbi.7639	10	1
Sbi.13250	10	1
Sbi.18666	10	21
Sbi.18665	10	1
Sbi.7843	10	1
Sbi.20011	10	1
Sbi.11337	10	2
Sbi.19929	10	1
Sbi.20712	10	2
Sbi.12316	10	1
Sbi.7336	10	1	CF759147 CF761049
Sbi.16309	10	1	CF771544
Sbi.20037	10	1
Sbi.17710	10	1
Sbi.1631	10	1	BE592904 BG933228
Sbi.6723	10	1	CF759576 CF770975
Sbi.18626	10	1
Sbi.9638	10	1	CF761799
Sbi.13040	10	3
Sbi.8416	10	1
Sbi.1151	10	1	AW678395 AW678506 AW678565 AW747285 AW747332 AW746986 AW924038 CF759183 CF771568
Sbi.20053	10	1
Sbi.5095	10	1
Sbi.9383	10	3
Sbi.14451	10	1	AW680223 AW679784 AW678906 AW746669 AW746584 AW924142 CF758330 CF758991 CF771783
Sbi.1178	10	1	CF771067 CF771831
Sbi.11826	10	2	AW680984 AW681144
Sbi.14666	10	1
Sbi.8332	10	1
Sbi.4445	10	1
Sbi.4955	10	1
Sbi.2046	10	1
Sbi.5536	10	1
Sbi.8104	10	1
Sbi.18225	10	1	CF757595 CF769726
Sbi.8810	10	1
Sbi.13148	10	278
Sbi.6218	10	1	CF757823 CF759773 CF759963 CF760630
Sbi.10675	10	1	AW746168
Sbi.14394	10	2	AW680302 AW679768 AW679966 AW745431 AW746153 AW745621 AW745649 AW746076 BE592890 CF771785
Sbi.11456	10	1
Sbi.11454	10	9
Sbi.20544	10	1	AW746538 CF758447
Sbi.8787	10	1
Sbi.13351	10	1	AW745541 AW747649 AW925040
Sbi.6042	10	1
Sbi.18458	10	1	AW746416 AW746534 CF761231
Sbi.18453	10	1	AW746039 AW746174 CF772892
Sbi.16076	10	1
Sbi.12982	10	1	AW678638 AW678708 AW678815 CF756329 CF756420
Sbi.12186	10	1
Sbi.19895	10	1
Sbi.5323	10	1
Sbi.452	10	2
Sbi.5892	10	1
Sbi.20051	10	1
Sbi.19790	10	1
Sbi.7552	10	1
Sbi.7888	10	1
Sbi.6062	10	1
Sbi.1484	10	1	CF759452 CF769359 CF769441
Sbi.14686	10	1	CF760487 CF761744
Sbi.18794	10	1
Sbi.18790	10	1
Sbi.3191	10	1
Sbi.11645	10	1
Sbi.19114	10	1
Sbi.6662	10	1	CF757677 CF759869
Sbi.12234	10	1
Sbi.2800	10	1	CF771998
Sbi.2805	10	1
Sbi.1064	10	1
Sbi.6649	10	1	CF757400 CF757460
Sbi.10861	10	1	CF761360
Sbi.9265	10	1
Sbi.3013	10	2
Sbi.405	10	1
Sbi.7061	10	1	CF772723
Sbi.10334	10	1	AW677891
Sbi.2282	10	1
Sbi.11573	10	1
Sbi.5479	10	1
Sbi.11211	10	1
Sbi.16602	10	1
Sbi.2868	10	1
Sbi.7130	10	3	CF759141 CF770899
Sbi.15009	10	1	CF770186 CF770262 CF772383
Sbi.16726	10	1
Sbi.21479	10	1
Sbi.9583	10	1
Sbi.4838	10	1
Sbi.18739	10	1
Sbi.19642	10	2
Sbi.6314	10	1	CF758878 CF769481 CF769565 CF769728 CF769652
Sbi.6941	10	1	AW747642 CF758381 CF771379
Sbi.7431	10	1	AW678388 AW679984 AW679294 AW680366 AW681138 AW677656 AW680976
AW745386 AW745470 AW745584 AW746434 AW746507 AW746819 AW747310 AW747637 AW745296
AW745842 AW746714 AW746847 AW747379 AW747616 AW745767 AW746729 AW924330 AW925005
AW925030 BE593748 BE594061 CF770347 CF770431 CF772501 CF772866
Sbi.2439	10	1	CF761646
Sbi.11052	10	1
Sbi.18861	11	1
Sbi.4693	11	1
Sbi.10866	11	1
Sbi.7857	11	1
Sbi.17150	11	1
Sbi.11329	11	1
Sbi.5715	11	1	AW678984 AW678009 AW924657 BE363844
Sbi.6534	11	2
Sbi.18967	11	1
Sbi.13052	11	1
Sbi.7345	11	1	CF755710 CF758558 CF758850 CF761855 CF755796
Sbi.266	11	1	AW680110 AW746145 BE363221 BG933335 BG933060
Sbi.13035	11	1	EB725756
Sbi.360	11	1	CF758323
Sbi.11313	11	1
Sbi.11441	11	1
Sbi.3163	11	1
Sbi.1790	11	1
Sbi.20363	11	1
Sbi.8519	11	1
Sbi.20424	11	1
Sbi.4987	11	1
Sbi.308	11	1	AW681184 BE593003 BE592313
Sbi.20767	11	1	CF761988
Sbi.17474	11	1
Sbi.340	11	1
Sbi.4890	11	1
Sbi.21524	11	1	CF757737 CF770332 CF770415 CF772317
Sbi.21584	11	1
Sbi.11861	11	1	AW747155 AW747185 AW747243 BG933232
Sbi.9882	11	1
Sbi.3865	11	1
Sbi.12954	11	2
Sbi.12377	11	1
Sbi.9324	11	1	CF760211 CF770328 CF770411
Sbi.13340	11	1	AW680707 AW680643
Sbi.8510	11	1
Sbi.20029	11	1
Sbi.611	11	1
Sbi.13029	11	1
Sbi.9241	11	1
Sbi.6584	11	1	AW745712 CF755768 CF755848 CF771334
Sbi.7844	11	2
Sbi.17007	11	1
Sbi.17532	11	1
Sbi.3006	11	1
Sbi.20943	11	1
Sbi.1981	11	1
Sbi.6746	11	1	CF760901
Sbi.10516	11	1
Sbi.6719	11	1	CF759238 CF761818
Sbi.20793	11	1
Sbi.11663	11	1	AW678988 AW678921
Sbi.13998	11	1	CF770036 CF770119 CF772126
Sbi.21297	11	1
Sbi.21161	11	1	CF759885 CF759894
Sbi.21282	11	1
Sbi.20159	11	1	AW678214 AW680436 AW924775 BE594300
Sbi.2031	11	1	AW747011 AW747086
Sbi.21559	11	1
Sbi.8012	11	1	AW677639 AW677690 CF772494
Sbi.20830	11	1
Sbi.17299	11	1
Sbi.7007	11	1	CF771524
Sbi.6602	11	1	CF756352 CF756441 CF757071
Sbi.5453	11	2
Sbi.20643	11	1
Sbi.20055	11	1
Sbi.6160	11	1
Sbi.17095	11	1	CF756017 CF770379 CF770460
Sbi.9357	11	1
Sbi.20429	11	1
Sbi.19649	11	1
Sbi.20686	11	2
Sbi.12576	12	1
Sbi.5800	12	1
Sbi.6596	12	1	CF756044 CF756119
Sbi.2176	12	1
Sbi.13745	12	1
Sbi.5455	12	1
Sbi.19424	12	2
Sbi.1930	12	2
Sbi.7995	12	1
Sbi.5630	12	1	BE594094 BE593780 BE592634 BE638162
Sbi.20024	12	1
Sbi.21618	12	2
Sbi.16941	12	1
Sbi.229	12	1	AW679975 AW745424 CF761763 CF770997 CF772200
Sbi.6738	12	1	CF760581
Sbi.6731	12	1	CF760141
Sbi.16558	12	1
Sbi.17209	12	2
Sbi.20951	12	1
Sbi.18162	12	1
Sbi.1144	12	1
Sbi.5248	12	1
Sbi.6282	12	3	CF756724 CF757354 CF761195
Sbi.6888	12	1	CF758096 CF760571
Sbi.23	12	1	BE592515 BE592377 CF759659 CF759835 CF761035
Sbi.13050	12	1
Sbi.10641	12	1	AW745341 BG933456
Sbi.19958	12	1
Sbi.20297	12	1
Sbi.21211	12	1
Sbi.21210	12	1
Sbi.17680	12	1	CF770124
Sbi.18234	12	1	CF761601
Sbi.15719	12	1
Sbi.2898	12	1
Sbi.4634	12	1	CF760283
Sbi.12380	12	1
Sbi.1816	12	1	AW747067 AW747077 CF760801
Sbi.5041	12	1	AW745425
Sbi.2238	12	1
Sbi.17469	12	2	CF761405
Sbi.5927	12	1	AW678881 AW679007 CF761826 CF771528
Sbi.4579	12	1	EB725763
Sbi.18035	12	1
Sbi.20783	12	1
Sbi.14169	12	1
Sbi.4980	12	1	CF761109
Sbi.14572	12	1	AW680295 CF757519
Sbi.15777	12	1
Sbi.12202	12	1
Sbi.5226	12	1
Sbi.8983	12	1
Sbi.6489	12	1	CF757707 CF759108 CF759111 CF759125 CF770288
Sbi.2394	12	1	CF770441
Sbi.5613	12	1
Sbi.5614	12	1	CF771823 CF771824
Sbi.10069	12	1	CF756912 CF759213 CF759267 CF759458
Sbi.6670	12	1	CF757862 CF760464 CF761841 CF771247
Sbi.21542	12	2	CF769482 CF769490 CF769576
Sbi.8942	12	1
Sbi.6814	12	3	CF771486 CF772014
Sbi.20197	12	1	AW677633 AW677809 AW677899 AW678186 AW678693 AW678766 AW678853 AW679999 AW680944 AW677761 AW678573 AW678095 AW678106 AW680819 AW681077 AW745321 AW746332 AW747210 AW925068 BE592154 BE592717 BE594188 BE592462 BE592492 EB725812
Sbi.6655	12	1	CF757532 CF757559 CF759263 CF760629 Sbi.9929	12	1	CF759897 CF760108 CF760167
Sbi.5400	12	1	AW679045 AW679474 AW680166 AW679450 AW680264 AW679394 AW679396 AW746725 AW746837 AW745971 AW746130 AW746100 AW924191 AW924637 AW924805 AW924887 BE363821 BE592973 BE593058 BE593327 BE593533 BE593639 BG933520 CF758093 CF758629 CF759985 CF760627 CF761821 CF770890 CF771790
Sbi.17759	12	1
Sbi.9893	12	1
Sbi.7013	12	1	AW679605 BG933452 CF760115 CF760692 CF772716
Sbi.8593	12	1
Sbi.1501	12	1	CF757165 CF759709 CF760355 CF760360 CF760361
Sbi.10913	12	1
Sbi.4592	12	1
Sbi.13081	12	1	AW746843 CF758776
Sbi.13275	12	1
Sbi.4337	12	1
Sbi.8754	12	1
Sbi.8759	12	1
Sbi.2673	12	1	AW678072 AW678152 AW745722 AW746909 AW745509 BE363517 BE593353 BE592379 BE593559 BM317778
Sbi.10006	12	2
Sbi.14724	12	1
Sbi.19890	12	1
Sbi.14056	12	2
Sbi.7419	12	1	CF771154 CF772164
Sbi.20228	12	14
Sbi.19869	12	1
Sbi.7774	12	1
Sbi.8844	12	1
Sbi.15037	12	1	AW677797 AW677854 CF756006 CF756007 CF756087 CF756088 CF759281
Sbi.21535	12	1	CF759472 CF770540
Sbi.10900	12	1
Sbi.12978	12	1	CF756179 CF761201 CF761817
Sbi.6935	12	1	AW680395 CF759898 CF771465
Sbi.6931	12	1	AW678377 AW924165 CF757330 CF760520 CF760543 CF770327 CF770348 CF770432 CF772009
Sbi.19221	12	1
Sbi.10228	12	1	BE593682
Sbi.14767	12	1
Sbi.630	12	1	AW678862 AW677645 AW745880 AW746051 AW746210 AW747255 AW747317 AW745953 AW746176 AW746499 AW747007 AW746424 AW924908 AW924830 AW925140 BE363223 BE363273 BE592670 BE638208 CF756026 CF756104 CF756991 CF758956 CF760148 CF760290 CF760386 CF761234 CF761534 CF770505 CF770595 CF771388 CF771518 CF771662 CF772480 EB725660 EB725661
Sbi.18893	12	1	CF772436
Sbi.490	12	1
Sbi.18097	12	1
Sbi.1926	12	1
Sbi.5700	12	1
Sbi.13007	12	2	CF759999 CF760527 CF761190 CF761934
Sbi.19209	12	1
Sbi.10203	12	1	CF756960
Sbi.14780	12	1	AW746492
Sbi.9118	12	1
Sbi.21622	12	2
Sbi.20716	12	1
Sbi.1743	12	1
Sbi.14062	12	1
Sbi.8673	12	1
Sbi.11351	12	1
Sbi.9284	12	1
Sbi.12109	12	1
Sbi.9131	12	1
Sbi.19903	12	1
Sbi.19013	12	1	EB725739
Sbi.12483	12	1
Sbi.3242	12	1
Sbi.19715	12	1
Sbi.9845	12	6
Sbi.19969	12	1
Sbi.21480	12	1
Sbi.12463	12	1
Sbi.18607	12	1
Sbi.2245	12	1
Sbi.17433	12	2
Sbi.9285	12	1
Sbi.21201	12	1
Sbi.6768	12	1	CF756031
Sbi.6760	12	3	CF761736 CF769873 CF769959
Sbi.12447	12	1
Sbi.9410	12	1
Sbi.10106	12	1
Sbi.4957	12	1
Sbi.18950	12	1	CF756977
Sbi.19535	12	1
Sbi.6427	12	1	CF756727 CF760171
Sbi.5052	12	1
Sbi.2418	12	1
Sbi.2415	12	1
Sbi.8601	12	1
Sbi.12396	12	1
Sbi.9694	12	1	CF760945
Sbi.11414	12	2	BE593176
Sbi.13991	12	1	CF759772 CF759782 CF759783 CF759792
Sbi.335	12	1	AW924611 AW924500 CF772314 CF772315 CF772783
Sbi.13354	12	1	AW746243 AW746281
Sbi.12980	12	2	AW924704 CF756333 CF761892
Sbi.4915	12	1
Sbi.106	12	1
Sbi.7144	12	1	CF756775 CF771360
Sbi.21243	12	1
Sbi.1012	12	1
Sbi.20114	12	15	AW678346 AW747293
Sbi.922	12	1
Sbi.920	12	1
Sbi.18910	12	1
Sbi.7335	12	1	CF760955 CF760967
Sbi.14561	12	1
Sbi.11882	12	2	AW747240 AW747166
Sbi.10109	12	1	CF759460
Sbi.12685	12	1
Sbi.12029	12	1
Sbi.20346	12	1
Sbi.19118	12	1
Sbi.21162	12	1
Sbi.9242	12	1
Sbi.146	12	1
Sbi.4800	12	1
Sbi.21280	12	2
Sbi.17558	12	1
Sbi.20169	12	1
Sbi.19171	12	1
Sbi.14948	12	1	CF772143
Sbi.7703	12	1
Sbi.18577	12	20
Sbi.10333	12	2
Sbi.2281	12	1
Sbi.11577	12	5
Sbi.2848	12	1
Sbi.18147	12	15
Sbi.14191	12	1	EB725742
Sbi.7008	12	1	CF758146 CF761714 CF772659 CF772848
Sbi.21453	12	1
Sbi.9959	12	1
Sbi.21472	12	3
Sbi.17890	12	18	AW678886 AW678900 AW678263 AW746417 AW746164 BE592518 BG933465 BG933480
Sbi.9355	12	2
Sbi.9277	12	2	EB725712
Sbi.8483	12	1
Sbi.17420	12	1
Sbi.7405	12	1	CF770526 CF770615 CF771636
Sbi.20230	12	1
Sbi.9839	13	1
Sbi.13244	13	1
Sbi.5160	13	1
Sbi.15367	13	1
Sbi.4345	13	1
Sbi.18335	13	1
Sbi.20432	13	1
Sbi.5731	13	1
Sbi.10756	13	1	AW677884
Sbi.9624	13	1	CF759520
Sbi.13059	13	2	CF761162
Sbi.4028	13	5	CF757138
Sbi.20527	13	1	AW745513 AW745624
Sbi.9424	13	1
Sbi.19722	13	1	CF758757
Sbi.7581	13	1
Sbi.12438	13	1
Sbi.4633	13	1	CF758168 CF758368 CF758914 CF760255 CF760272 CF760719 CF761121 CF771453 CF772493 CF772523
Sbi.12387	13	1
Sbi.10545	13	2	AW745879 AW745996 BE593933 BE594254 CF760864 CF769401 CF771538
Sbi.1810	13	1
Sbi.10157	13	1
Sbi.10733	13	1	AW679923
Sbi.7543	13	1
Sbi.6050	13	1
Sbi.10131	13	1
Sbi.4189	13	1
Sbi.20998	13	1
Sbi.84	13	1
Sbi.85	13	1
Sbi.13306	13	1
Sbi.11656	13	1
Sbi.10871	13	1
Sbi.19633	13	1
Sbi.9902	13	1
Sbi.14034	13	1
Sbi.12833	13	2
Sbi.10798	13	1
Sbi.20442	13	1
Sbi.10635	13	1	AW745959 AW745884
Sbi.1568	13	1	AW679980
Sbi.9895	13	2
Sbi.20306	13	1
Sbi.16805	13	1	CF758760
Sbi.8775	13	1
Sbi.7010	13	1	CF756564 CF756640 CF758060 CF756030
Sbi.1362	13	1
Sbi.2857	13	4
Sbi.19610	13	1
Sbi.2502	13	1
Sbi.20865	13	1
Sbi.21588	13	1
Sbi.7753	13	1	CF759035
Sbi.11711	13	1
Sbi.6404	13	1
Sbi.9575	13	2
Sbi.18441	13	1	AW680833 CF756847
Sbi.15258	13	1	BE592946 BG933272 CF761607
Sbi.5609	13	1
Sbi.8685	13	1
Sbi.20208	13	1	AW679660 AW923916
Sbi.4680	13	1
Sbi.10221	13	1
Sbi.7869	13	1
Sbi.213	13	1	AW681143 AW680981
Sbi.17495	13	1	CF760680 CF760962 CF761507
Sbi.9631	13	1
Sbi.21011	13	1
Sbi.12876	13	1
Sbi.7658	13	2
Sbi.6197	13	1	CF758503 CF772414
Sbi.13256	13	1	AW747045
Sbi.4035	13	1
Sbi.4482	13	1	CF756808
Sbi.5537	13	1
Sbi.21051	13	1
Sbi.5951	13	1
Sbi.15519	13	1
Sbi.10552	13	1	AW681066 AW680934 AW746405 AW924051 BE592308 BE592998 BE592999
Sbi.8786	13	1
Sbi.20431	13	3
Sbi.1403	13	1	AW678073 AW678153 CF771509 CF771546
Sbi.313	13	1	BE593617 BE593207
Sbi.2596	13	1
Sbi.11884	13	1	AW679848 AW923985 BE592747 BE592617
Sbi.13105	13	1
Sbi.9240	13	1
Sbi.20539	13	1	AW747518
Sbi.147	13	1	AW747523 AW747410
Sbi.20483	13	2	AW677660 AW677704 AW678548 BE363432 BE363316 CF759688
Sbi.2635	13	1	CF770693 CF770777
Sbi.1559	13	1	AW678444
Sbi.9919	13	1
Sbi.1395	13	2
Sbi.8883	13	1
Sbi.2671	13	1
Sbi.4130	13	1	CF757428 CF760179
Sbi.669	13	1	AW680687 AW677918 AW680657 AW747198 AW747213
Sbi.19190	13	1
Sbi.10377	13	1
Sbi.14124	13	1	CF756580 CF756655 CF756685 CF760001 CF771933
Sbi.16663	13	1
Sbi.240	13	1	AW745804 BE592384 BE592519 CF758497 CF759196 CF759241 CF761966 CF772766
Sbi.7958	13	1
Sbi.19875	13	1
Sbi.10581	13	1	AW924675 BE363815 CF759798 CF760241
Sbi.6433	13	1	CF757375
Sbi.6124	13	1	BE593894
Sbi.12754	14	1	AW680165 AW681183 BE593936 BE594257
Sbi.7208	14	1	CF756040 CF756115 CF760247 CF761867
Sbi.2510	14	1
Sbi.7204	14	1	CF755779 CF755858 CF757489 CF761204
Sbi.14232	14	1
Sbi.11983	14	1
Sbi.11222	14	1	CF756493 CF761716
Sbi.15792	14	3
Sbi.12516	14	1
Sbi.14822	14	1
Sbi.15426	14	1
Sbi.19932	14	1
Sbi.18084	14	1	AW678055 AW680134 AW681068 AW678136 AW680936 BE592311 BG933550 BM317820 CF761301 CF761401 CF761471 CF761576 CF770903 CF771048 CF771049 CF771060 CF771061 CF771764 CF772701
Sbi.10685	14	1	AW681153 AW680966 BG933308
Sbi.20581	14	2	BG933377 BG933003
Sbi.20762	14	1
Sbi.279	14	1	AW747513 AW747393 CF756231 CF756313 CF756503 CF756585 CF757153 CF761161 CF771638
Sbi.2710	14	1
Sbi.21611	14	1
Sbi.21610	14	1
Sbi.1605	14	2	AW678041 AW747608 AW924996 AW924396 AW924513 BE363666 BE363732 BE594136 BE593819 CF758647 CF760752
Sbi.15328	14	1
Sbi.4271	14	1
Sbi.1918	14	1
Sbi.12498	14	1
Sbi.19769	14	3
Sbi.15920	14	1
Sbi.19398	14	1
Sbi.8261	14	1
Sbi.3485	14	2
Sbi.4456	14	1
Sbi.28	14	1	CF760799 CF772774
Sbi.5506	14	1
Sbi.8173	14	1
Sbi.10192	14	5
Sbi.21212	14	1
Sbi.14670	14	1
Sbi.16005	14	1
Sbi.8115	14	1
Sbi.1833	14	1
Sbi.5202	14	1	AW678956 AW679005 CF757906
Sbi.16923	14	1	CF770835
Sbi.15521	14	1
Sbi.17673	14	1	CF756185 CF756232 CF759682 CF761424
Sbi.2231	14	1
Sbi.18029	14	1	CF757112 CF757765 CF759803
Sbi.17672	14	1	CF755999 CF758676 CF772857
Sbi.8850	14	1
Sbi.10155	14	1
Sbi.329	14	1	AW747444 AW747491 CF758874 CF759352 CF759491 CF761377 CF761484
Sbi.8843	14	1
Sbi.11870	14	1	AW746160 AW746058
Sbi.21506	14	2
Sbi.20100	14	1
Sbi.20315	14	1
Sbi.2003	14	1
Sbi.3519	14	2	CF757562 CF770452 CF770714 CF770797 CF770371
Sbi.19124	14	1	CF756720 CF760226
Sbi.9214	14	1
Sbi.20160	14	1
Sbi.2023	14	1
Sbi.6675	14	1	CF758010 CF760876
Sbi.12226	14	1
Sbi.5553	14	1
Sbi.10790	14	1	AW746008 BE593909 BE594226
Sbi.12524	14	1
Sbi.995	14	1	AW679444 AW679382
Sbi.18749	14	1	CF759503
Sbi.20826	14	1
Sbi.10636	14	1	AW745795 AW745724
Sbi.1381	14	1	CF757983 CF758583
Sbi.2830	14	1
Sbi.10402	14	1
Sbi.1719	14	1
Sbi.16539	14	1
Sbi.6831	14	1	CF772645
Sbi.18813	14	1
Sbi.19639	14	1
Sbi.19145	14	1
Sbi.2668	14	1
Sbi.1795	14	2
Sbi.17516	14	1
Sbi.10270	14	1	AW747639 AW925032
Sbi.13880	14	1	CF756780
Sbi.4109	14	1
Sbi.17416	14	1
Sbi.10362	14	1
Sbi.5996	14	1
Sbi.5991	14	1	CF757344
Sbi.6351	14	1	CF756986 CF757485
Sbi.13716	14	1
Sbi.6400	14	1	CF757227
Sbi.6154	14	4	CF757621
Sbi.5832	14	1	AW681052 AW678312 AW680919 AW678224 AW747496 CF757160 CF759752 CF771428
Sbi.6925	14	1	AW747362 AW747474 AW747440 CF770358 CF770442 CF771738
Sbi.6098	14	1
Sbi.12955	14	1
Sbi.2330	14	1
Sbi.15350	14	1
Sbi.9326	14	1	CF761872
Sbi.3410	14	1
Sbi.17505	14	1
Sbi.13778	14	1
Sbi.8276	14	1
Sbi.13590	14	1
Sbi.13593	14	1
Sbi.6424	14	1	CF761366
Sbi.21325	14	1	CF770991
Sbi.10906	14	1
Sbi.11058	14	1
Sbi.9373	14	1
Sbi.15192	14	2	AW924782 AW924742 AW924858 AW924698 BE363812
Sbi.7601	14	1
Sbi.4686	14	1	AW677695 AW678057 AW678138 AW677683
Sbi.5974	14	1
Sbi.2741	14	1
Sbi.13922	14	1
Sbi.7459	14	1	AW677647 AW680807 AW677756 AW745540 AW747099 AW747034 BE594280 EB725699
Sbi.7216	14	1	AW746070 AW746158 CF756184 CF756272 CF759101 CF769371 CF769452 CF769682 CF769758 CF772665 CF769748
Sbi.11689	14	1
Sbi.8932	14	1
Sbi.2500	14	1
Sbi.21368	14	1
Sbi.21198	14	4
Sbi.11014	14	1
Sbi.8859	14	1
Sbi.7286	14	1	CF757499 CF757926 CF758308 CF758515 CF758769
Sbi.3154	14	1	AW678170 AW746734 AW746825
Sbi.20031	14	2
Sbi.5706	14	1
Sbi.17167	14	1
Sbi.21602	14	1
Sbi.21608	14	3
Sbi.16957	14	1
Sbi.16958	14	1
Sbi.7679	14	1
Sbi.509	14	1	AW677638 AW677692
Sbi.15134	14	1	AW745731 AW745864
Sbi.15568	14	1
Sbi.10248	14	1
Sbi.14433	14	1
Sbi.12874	14	1
Sbi.19968	14	1
Sbi.18389	14	1	AW678839 BE363685 BE363690
Sbi.17635	14	1
Sbi.18603	14	1
Sbi.19733	14	1	CF758426
Sbi.3110	14	1
Sbi.2479	14	1
Sbi.8623	14	1
Sbi.10576	14	1	BE592400
Sbi.17873	14	1	CF759638 CF771246
Sbi.13047	14	1
Sbi.11847	14	1	AW678008 AW680529 AW745967 BE594252 BE593931
Sbi.758	14	1	AW679443
Sbi.9197	14	1	CF756077
Sbi.13414	14	1
Sbi.6561	14	1	CF758081 CF759226 CF760222
Sbi.7784	14	1
Sbi.1256	14	1	CF757218
Sbi.19511	14	1
Sbi.8871	14	1
Sbi.11604	14	1
Sbi.11603	14	1	AW679217 AW679308
Sbi.15726	14	1	CF771001
Sbi.9202	14	1	BE592309
Sbi.4781	14	1	AW678332 AW678226 CF760081
Sbi.5570	14	1
Sbi.5894	14	1
Sbi.3500	14	1	AW679829 AW923983
Sbi.4508	14	1
Sbi.20517	14	1	AW679931 AW746095 AW746136
Sbi.13101	14	1
Sbi.20515	14	1	AW679675 AW923888
Sbi.17339	14	1
Sbi.16267	14	1
Sbi.17184	14	1
Sbi.18534	14	1
Sbi.377	14	1
Sbi.10666	14	1	AW746566 AW746677 BE363195 BE363261
Sbi.14541	14	1
Sbi.6271	14	1	BE592282 BE592813 CF761563
Sbi.20531	14	1	AW745889
Sbi.6495	14	1	CF756169 CF756257
Sbi.5607	14	4
Sbi.684	14	1	AW677635 AW677759 CF770673 CF770760
Sbi.6027	14	1
Sbi.17761	14	1	AW677689 AW678436 AW678452 AW678639 AW678709 AW679069 AW679345 AW680138 AW680450 AW680608 AW680649 AW680694 AW680721 AW680812 AW680823 AW680836 AW681000 AW678526 AW679151 AW679424 AW679485 AW679843 AW680085 AW680398 AW680429 AW680540 AW677672 AW678501 AW679352 AW679408 AW680763 AW745405 AW745947 AW746580 AW746826 AW747596 AW745826 AW746019 AW747512 AW747600 AW745783 AW747061 AW924302 AW924317 AW9…
Sbi.16814	14	1	BE593992
Sbi.19156	14	1
Sbi.6628	14	1	CF756696 CF757057
Sbi.2280	14	1	CF771989
Sbi.640	14	1
Sbi.10609	14	1	AW679749 AW923963
Sbi.5516	14	1
Sbi.9909	14	1
Sbi.4588	14	1
Sbi.5368	14	1
Sbi.21594	14	1
Sbi.6166	14	1	CF756784 CF757404 CF759418 CF760489 CF770343 CF770897 CF772086 CF770427
Sbi.5843	14	1
Sbi.18820	14	1
Sbi.19990	14	1
Sbi.17090	14	1
Sbi.20870	14	3	CF756021
Sbi.20254	14	1
Sbi.18455	14	1	AW746228 AW746311
Sbi.14676	14	1	AW745935 AW746016 BE592307 BE592997
Sbi.5596	14	1
Sbi.21310	14	1
Sbi.12774	14	4
Sbi.608	14	1	AW745785 AW745824 AW924426 BE363711 CF760802 CF772357
Sbi.5638	14	1
Sbi.6945	14	1	AW746511 AW746438 CF756517 CF756599 CF759322 CF760394 CF772088
Sbi.19873	14	1
Sbi.6432	14	1	CF772282
Sbi.16668	15	1
Sbi.2633	15	1
Sbi.4412	15	1
Sbi.20971	15	2
Sbi.6478	15	1	CF757013
Sbi.14637	15	1
Sbi.20727	15	1
Sbi.8978	15	1
Sbi.6758	15	1	CF761519
Sbi.6759	15	1	CF761675
Sbi.1085	15	1	BE592958 BG933284
Sbi.18960	15	1
Sbi.7644	15	1
Sbi.12451	15	1
Sbi.4928	15	1
Sbi.5523	15	1
Sbi.4008	15	1
Sbi.7452	15	1	CF771618 CF771943
Sbi.7567	15	1
Sbi.9492	15	1
Sbi.10159	15	1	CF760550
Sbi.3534	15	1
Sbi.12998	15	1	CF761122 CF761131 CF761141 CF771724
Sbi.16475	15	1
Sbi.13638	15	1
Sbi.6075	15	1
Sbi.366	15	1
Sbi.2621	15	1
Sbi.19359	15	1
Sbi.19351	15	1
Sbi.1446	15	1
Sbi.7265	15	1	CF756565 CF756641 CF757705 CF760954
Sbi.16825	15	1
Sbi.15666	15	1
Sbi.9711	15	1	CF761974
Sbi.9945	15	1
Sbi.13089	15	1
Sbi.20985	15	1
Sbi.3474	15	1	AW924120 BE592982 BG933305 CF758247 CF760249 CF769684 CF769760 CF770549 CF770636 CF770853 CF772262 CF772660
Sbi.8256	15	1
Sbi.676	15	1	AW678654 AW678800 AW678733 BE363419 CF771678
Sbi.21460	15	1
Sbi.20417	15	1
Sbi.3067	15	1
Sbi.11735	15	1	EB725754
Sbi.8513	15	1
Sbi.12359	15	2	CF760116
Sbi.8470	15	1
Sbi.10260	15	1
Sbi.10046	15	1
Sbi.21629	15	1
Sbi.2493	15	1
Sbi.1615	15	1	BE363389 CF771910
Sbi.7868	15	1
Sbi.19904	15	1
Sbi.15137	15	1	AW745802 AW747648 CF761081 EB725708
Sbi.12666	15	1
Sbi.10252	15	1
Sbi.7805	15	1
Sbi.19963	15	1
Sbi.20288	15	1
Sbi.6745	15	2	CF760852
Sbi.18019	15	1	AW747497 AW747421 AW924110 BE363309 CF761479
Sbi.10169	15	1
Sbi.20992	15	1
Sbi.3327	15	1
Sbi.19071	15	1
Sbi.6789	15	1	CF770493 CF770584
Sbi.1788	15	1
Sbi.12423	15	2
Sbi.902	15	1
Sbi.11415	15	1
Sbi.8125	15	1
Sbi.7579	15	3	BE638177
Sbi.11294	15	1
Sbi.12403	15	1
Sbi.9847	15	1	CF772120
Sbi.19138	15	1
Sbi.14909	15	1
Sbi.21519	15	1	CF756125
Sbi.1071	15	1	CF771537
Sbi.11643	15	1
Sbi.14542	15	1	CF760518
Sbi.9246	15	1
Sbi.14960	15	1
Sbi.19320	15	1
Sbi.11782	15	1
Sbi.12256	15	1
Sbi.12252	15	1	CF759133
Sbi.5794	15	1	AW680224 AW924143 CF760612 CF772621 EB725777 EB725781
Sbi.21125	15	1
Sbi.1390	15	1
Sbi.7932	15	1
Sbi.3240	15	2
Sbi.20275	15	2
Sbi.14073	15	1	AW680331 AW924198 CF760674 CF761047 CF772561 CF772699
Sbi.15657	15	1
Sbi.13096	15	1	EB725713
Sbi.21597	15	1
Sbi.667	15	1	CF758186 CF770479
Sbi.17097	15	1
Sbi.448	15	1
Sbi.8743	15	2
Sbi.9353	15	1
Sbi.3118	15	7
Sbi.8202	15	1	BE593661 BE593247
Sbi.5217	15	1
Sbi.622	16	1	AW680232 AW680889 AW677803 AW680773 AW746521 AW747526 AW746452 AW747407 AW924153 BE593189 BE593500 CF757826 CF758183 CF769485 CF769570
Sbi.21438	16	1
Sbi.6335	16	1	CF757304 CF757645
Sbi.7426	16	1	CF772231 CF772401
Sbi.7383	16	1	CF770524 CF770613 CF770823
Sbi.9318	16	1
Sbi.21098	16	1
Sbi.11301	16	1
Sbi.9819	16	2
Sbi.10687	16	1	AW680912 AW681046
Sbi.18334	16	1	CF758090 CF772124
Sbi.6905	16	1	CF757140 CF757473 CF757699
Sbi.5738	16	1
Sbi.21615	16	3
Sbi.21614	16	1
Sbi.7607	16	1
Sbi.20569	16	1	BE593140 CF761762
Sbi.15140	16	1	AW745997 AW747350 AW745886 AW747263 BE593254 BE593669 CF758013
Sbi.9462	16	1	CF759164
Sbi.4473	16	2	AW680744
Sbi.20748	16	1
Sbi.11690	16	3
Sbi.1149	16	1
Sbi.9850	16	1	AW679024 AW679095 BE594107 BE593795
Sbi.19978	16	1
Sbi.7489	16	1
Sbi.4670	16	2	CF760131
Sbi.4908	16	2
Sbi.19705	16	1
Sbi.8172	16	1
Sbi.21003	16	1
Sbi.20060	16	1
Sbi.11365	16	1
Sbi.3353	16	1	AW679080
Sbi.7341	16	1	CF761591 CF761596 CF771811
Sbi.18395	16	1	AW679614 BE593393 BG933475
Sbi.16903	16	1
Sbi.21214	16	1
Sbi.11152	16	1	BE593690 BE593273
Sbi.5699	16	1
Sbi.3312	16	1	AW680770 AW680261 AW680891 AW924176 BE592300 BE592990 CF756392 CF756478 CF756692 CF757409 CF760895 CF771291 CF771807
Sbi.12437	16	1	GU357830
Sbi.7560	16	1
Sbi.5049	16	1	BM317734
Sbi.9217	16	1
Sbi.19887	16	1
Sbi.2166	16	1
Sbi.20123	16	1
Sbi.325	16	1	BE363507 BM317798 CF760265
Sbi.3656	16	1	AW745910 AW924665 AW924769 BE363829
Sbi.5979	16	1
Sbi.14058	16	1
Sbi.20311	16	2
Sbi.20103	16	1
Sbi.20108	16	1	EB725831
Sbi.11141	16	1	AW678827 AW678633 AW678703 AW745890 AW745992
Sbi.18521	16	1	BE638197
Sbi.7528	16	1
Sbi.1856	16	1	CF760333 CF772350
Sbi.6692	16	2	CF757565 CF758118 CF758269
Sbi.21566	16	4
Sbi.11420	16	1
Sbi.2028	16	2
Sbi.21361	16	2
Sbi.8085	16	1
Sbi.8889	16	1
Sbi.19108	16	1
Sbi.2624	16	1
Sbi.4888	16	3
Sbi.17604	16	1
Sbi.2812	16	1
Sbi.173	16	1	BE363496 BM317805 CF758217
Sbi.6246	16	1	AW679964 CF756393 CF756479
Sbi.17541	16	2
Sbi.8710	16	1
Sbi.20821	16	1
Sbi.19163	16	1
Sbi.9921	16	1
Sbi.3432	16	1	AW746226 AW746313 BE592317 BE593008 CF758406
Sbi.17755	16	1
Sbi.8308	16	1	AW924281 BE593575 BE593997
Sbi.8658	16	1
Sbi.12054	16	1
Sbi.8596	16	1
Sbi.20262	16	1
Sbi.21585	16	1
Sbi.10284	16	1
Sbi.2316	16	1
Sbi.18857	16	1
Sbi.19981	16	1
Sbi.675	16	1
Sbi.21469	16	1
Sbi.299	16	1	AW924672
Sbi.21326	16	1	CF761789
Sbi.3883	16	3
Sbi.21228	16	1
Sbi.2932	16	1
Sbi.11504	16	1
Sbi.5153	16	1
Sbi.2748	16	1
Sbi.10227	16	1	CF770477 CF770569
Sbi.8047	16	1
Sbi.18093	16	1
Sbi.21423	16	1	CF757019 CF757257 CF759255 CF759687
Sbi.6582	16	1	CF755754 CF755836 CF759717 CF772173
Sbi.18403	16	1	AW680162 AW925072 BE594054 BE593740 BG933487 CF770969
Sbi.8184	16	1	AW747731
Sbi.13005	16	1	CF756721 CF760190 CF761365 CF761446 CF761649
Sbi.7846	16	1
Sbi.9808	16	1
Sbi.14788	16	1
Sbi.18634	16	1
Sbi.212	16	1	AW678636 AW678767 AW681002 AW678864
Sbi.9281	16	1
Sbi.5540	16	1
Sbi.21389	16	2
Sbi.20034	16	1
Sbi.15454	16	1
Sbi.238	16	1	AW745469 AW746724 AW745583 AW745495
Sbi.7675	16	2
Sbi.14085	16	1
Sbi.5136	16	1
Sbi.11085	16	1
Sbi.15918	16	1	CF758084 CF761010 CF769365 CF769447 AW745564
Sbi.7803	16	1
Sbi.4861	16	1
Sbi.12292	16	1
Sbi.12296	16	1
Sbi.3472	16	1	AW679534 BG933142
Sbi.4224	16	1
Sbi.15113	16	1	AW680749 CF756733
Sbi.17646	16	1
Sbi.7820	16	1
Sbi.12854	16	1
Sbi.20726	16	1
Sbi.8624	16	1
Sbi.17521	16	1
Sbi.19534	16	1
Sbi.11678	16	1	AW681112 AW681034 AW746120 AW746085
Sbi.5050	16	1
Sbi.17802	16	1
Sbi.17962	16	1	AW678668 AW679549 AW678747 AW746183 AW747657 AW746044 AW925048
Sbi.4974	16	1
Sbi.2783	16	1
Sbi.4204	16	1
Sbi.13605	16	1	CF757161 CF759716
Sbi.17472	16	1
Sbi.18057	16	1
Sbi.12185	16	1
Sbi.6239	16	1	AW680434 BE363647 CF757423 CF761767
Sbi.5572	16	1
Sbi.4226	16	1
Sbi.314	16	1	BE593636 BE593223
Sbi.17837	16	1	CF757203 CF760843
Sbi.6066	16	1
Sbi.17452	16	1
Sbi.20512	16	1	AW679279 AW680671 AW924631 AW924512 BE593580 BE638179 CF757493 CF758751 CF759266 CF759997 CF769416 CF771358 CF771372 CF771441 CF771498 CF772458 CF772555 CF772588 CF772682 CF772908
Sbi.18070	16	3
Sbi.21511	16	1	CF759996
Sbi.7940	16	1
Sbi.11036	16	1
Sbi.20174	16	1
Sbi.15223	16	1	BE593588 BE594013
Sbi.21527	16	1	CF758097
Sbi.3629	16	1
Sbi.13641	16	1
Sbi.3190	16	1
Sbi.4749	16	1
Sbi.13124	16	1
Sbi.2121	16	1	CF757148
Sbi.6261	16	1	AW745542 AW745507 CF758171 CF758931 CF759968 CF761798
Sbi.10387	16	1
Sbi.3378	16	1
Sbi.5603	16	1
Sbi.9053	16	1	AW745581 AW745467
Sbi.355	16	1	AW680160 AW747559 AW924943 CF771110
Sbi.423	16	1
Sbi.9914	16	2
Sbi.9268	16	1
Sbi.6526	16	1	CF756967
Sbi.8399	16	1	CF772662
Sbi.7707	16	1	CF772764
Sbi.407	16	1
Sbi.14253	16	1	AW745664
Sbi.5470	16	1
Sbi.19369	16	1
Sbi.6423	16	1	CF755786 CF755864 CF756419 CF757040 CF761542 CF761950 CF769781 CF772792 CF772845 CF769708
Sbi.11749	16	1	CF758493
Sbi.12736	16	1
Sbi.18803	16	1
Sbi.2678	16	2
Sbi.20274	16	1
Sbi.15651	16	1	BE592524
Sbi.15656	16	1	AW924844
Sbi.1057	16	1	CF771357
Sbi.21595	16	1
Sbi.20641	16	1
Sbi.20528	16	1	AW745516 AW745532 CF761347
Sbi.11947	16	1	BE592685 BE638216
Sbi.9640	16	3
Sbi.19999	16	1
Sbi.19996	16	1
Sbi.8480	16	1
Sbi.8487	16	1
Sbi.242	16	1	AW745905 BE593564 BE593358
Sbi.14487	16	1	BE592215
Sbi.6140	16	1
Sbi.10038	16	1
Sbi.14790	16	1
Sbi.14252	16	1
Sbi.7956	16	1
Sbi.20232	16	1
Sbi.10232	16	1
Sbi.10586	16	1	AW745688 BE363219 BE363246
Sbi.19943	17	1
Sbi.9830	17	1
Sbi.11989	17	1	CF758143
Sbi.14774	17	1	AW681090 AW745810 AW746294 BE592929 BG933255
Sbi.6472	17	1
Sbi.20391	17	1	CF755911 CF755979 CF756358 CF756447 CF758355 CF761206 CF772534
Sbi.12672	17	1
Sbi.249	17	1	AW746789
Sbi.3017	17	1
Sbi.5087	17	1
Sbi.8110	17	1	AW745816 AW745754 BE363433 BE592691 CF771720 EB725721
Sbi.11388	17	1
Sbi.16433	17	1
Sbi.20509	17	1	AW678973 CF758900
Sbi.10715	17	1	AW677955 AW678020 AW745501 CF757393 CF761431
Sbi.9993	17	1	CF761888
Sbi.3917	17	1
Sbi.18929	17	1
Sbi.20312	17	1	BE592440
Sbi.11857	17	1	AW746675 BE363398
Sbi.11851	17	1	AW745791 AW745818
Sbi.20781	17	1
Sbi.14104	17	2	AW678579 AW679198 AW680242 AW680521 AW678282 AW679276 AW746096 AW747534 AW746134 AW747542 AW745351 AW924838 AW925039 BE363615 BE592277 BE592810 BE593975 CF757536 CF770694 CF770778
Sbi.4211	17	1
Sbi.13343	17	1	AW678575 AW680155 AW678517 AW747201 BG933526
Sbi.6051	17	1
Sbi.14348	17	1
Sbi.18527	17	3
Sbi.12201	17	1
Sbi.19812	17	1
Sbi.21299	17	2
Sbi.5933	17	1	CF760481 CF769986 CF770070
Sbi.20445	17	1
Sbi.20634	17	1
Sbi.13672	17	1
Sbi.14531	17	1
Sbi.12240	17	1
Sbi.9920	17	1
Sbi.5409	17	1
Sbi.9088	17	1
Sbi.470	17	1
Sbi.6342	17	1	CF758800 CF760982 CF761535 CF761676
Sbi.10945	17	1	CF756338 CF756428 CF761516 CF756224
Sbi.8002	17	2
Sbi.17438	17	1
Sbi.237	17	1	AW745317 AW745914 BE592680 CF772420
[truncated: 8,633 more rows]
